# Supplementary material for: Conserved Residues Adjacent to ß-Barrel and Loop Intersection among Enterovirus VP1 Affect Viral Replication: Potential Target for Anti-Enteroviral Development
Source: MDPI journal article supplement (doi:10.3390/v14020364), 2022-02-10
Supplement: s1 [file s1]

**Table S1. Overlapping extension PCR primer sequences for alanine substitution.**

|           | <b>Primer Name</b> | <b>Sequence (5' -&gt; 3')</b> |
|-----------|--------------------|-------------------------------|
| VP1-R86A  | AG2696GC-F         | GATAGCTTCTTCAGCGCAGCAGGATTAG  |
|           | AG2696GC-R         | CTAATCCTGCTGCGCTGAAGAAGCTATC  |
| VP1-E134A | A2841C-F           | CGTTTTGACGCAGCGTTCACCTTT      |
|           | A2841C-R           | AAAGGTGAACGCTGCGTCAAAACG      |
| VP1-P157A | C2909G-F           | CATGTTTGTAGCACCCGGAGCCC       |
|           | C2909G-R           | GGGCTCCGGGTGCTACAAACATG       |
| VP1-P193A | C3017G-F           | GCACAGGTTTCTGTTGCATTCATGTCAC  |
|           | C3017G-R           | GTGACATGAATGCAACAGAAACCTGTGC  |
| VP1-G231A | G3132C-F           | CAAACAACATGATGGCTACGTTCTCAGTG |
|           | G3132C-R           | CACTGAGAACGTAGCCATCATGTTGTTTG |
| VP1-K256A | AA3206GC-F         | CATGAGGATGGCGCACGTCAGG        |
|           | AA3206GC-R         | CCTGACGTGCGCCATCCTCATG        |
