# Supplementary material for: Conserved Residues Adjacent to ß-Barrel and Loop Intersection among Enterovirus VP1 Affect Viral Replication: Potential Target for Anti-Enteroviral Development
Source: MDPI journal article supplement (doi:10.3390/v14020364), 2022-02-10
Supplement: s1 [file s1]

|             | αααα |      | βA |    | η1 |    | η2 |    |
|-------------|------|------|----|----|----|----|----|----|
| QUS47950..1 | 1    | 1q   | 2q | 3q | 4q | 5q | 6q | 7q |
| QUS47950.1  | GR   | VADV | VI | SS | IG | DV | SV | SR |
| QWY16112.1  | GR   | VADV | VI | SS | IG | DV | SV | SR |
| QWY16110.1  | GR   | VADV | VI | SS | IG | DV | SV | SR |
| QWY16109.1  | GR   | VADV | VI | SS | IG | DV | SV | SR |
| QWY16107.1  | GR   | VADV | VI | SS | IG | DV | SV | SR |
| QWY16106.1  | GR   | VADV | VI | SS | IG | DV | SV | SR |
| QWY16105.1  | GR   | VADV | VI | SS | IG | DV | SV | SR |
| QWY16104.1  | GR   | VADV | VI | SS | IG | DV | SV | SR |
| QNN25841.1  | GR   | VADV | VI | SS | IG | DV | SV | SR |
| QNN25838.1  | GR   | VADV | VI | SS | IG | DV | SV | SR |
| QNN25837.1  | GR   | VADV | VI | SS | IG | DV | SV | SR |
| QNN25836.1  | GR   | VADV | VI | SS | IG | DV | SV | SR |
| QNN25843.1  | GR   | VADV | VI | SS | IG | DV | SV | SR |
| QWY16092.1  | GR   | VADV | VI | SS | IG | DV | SV | SR |
| QWY16090.1  | GR   | VADV | VI | SS | IG | DV | SV | SR |
| QWY16084.1  | GR   | VADV | VI | SS | IG | DV | SV | SR |
| QWY16083.1  | GR   | VADV | VI | SS | IG | DV | SV | SR |
| QWY16080.1  | GR   | VADV | VI | SS | IG | DV | SV | SR |
| QWY16080.1  | GR   | VADV | VI | SS | IG | DV | SV | SR |
| QWY16079.1  | GR   | VADV | VI | SS | IG | DV | SV | SR |
| QWY16078.1  | GR   | VADV | VI | SS | IG | DV | SV | SR |
| QWY16075.1  | GR   | VADV | VI | SS | IG | DV | SV | SR |
| QWY16074.1  | GR   | VADV | VI | SS | IG | DV | SV | SR |
| QWY16056.1  | GR   | VADV | VI | SS | IG | DV | SV | SR |
| QWY16147.1  | GR   | VADV | VI | SS | IG | DV | SV | SR |
| QWY16146.1  | GR   | VADV | VI | SS | IG | DV | SV | SR |
| QOP74909.1  | GR   | VADV | VI | SS | IG | DV | SV | SR |
| QUS47948.1  | GR   | VADV | VI | SS | IG | DV | SV | SR |
| QUS47947.1  | GR   | VADV | VI | SS | IG | DV | SV | SR |
| QUS47946.1  | GR   | VADV | VI | SS | IG | DV | SV | SR |
| QUS47944.1  | GR   | VADV | VI | SS | IG | DV | SV | SR |
| QUS47942.1  | GR   | VADV | VI | SS | IG | DV | SV | SR |
| QUS47941.1  | GR   | VADV | VI | SS | IG | DV | SV | SR |
| QWY16159.1  | GR   | VADV | VI | SS | IG | DV | SV | SR |
| QWY16158.1  | GR   | VADV | VI | SS | IG | DV | SV | SR |
| QWY16157.1  | GR   | VADV | VI | SS | IG | DV | SV | SR |
| QWY16153.1  | GR   | VADV | VI | SS | IG | DV | SV | SR |
| QWY16151.1  | GR   | VADV | VI | SS | IG | DV | SV | SR |
| QWY16145.1  | GR   | VADV | VI | SS | IG | DV | SV | SR |
| QWY16143.1  | GR   | VADV | VI | SS | IG | DV | SV | SR |
| QWY16139.1  | GR   | VADV | VI | SS | IG | DV | SV | SR |
| QWY16138.1  | GR   | VADV | VI | SS | IG | DV | SV | SR |
| QWY16135.1  | GR   | VADV | VI | SS | IG | DV | SV | SR |
| QWY16134.1  | GR   | VADV | VI | SS | IG | DV | SV | SR |
| QWY16133.1  | GR   | VADV | VI | SS | IG | DV | SV | SR |
| QWY16132.1  | GR   | VADV | VI | SS | IG | DV | SV | SR |
| QWY16131.1  | GR   | VADV | VI | SS | IG | DV | SV | SR |
| QWY16130.1  | GR   | VADV | VI | SS | IG | DV | SV | SR |
| QWY16129.1  | GR   | VADV | VI | SS | IG | DV | SV | SR |
| QWY16127.1  | GR   | VADV | VI | SS | IG | DV | SV | SR |
| QWY16125.1  | GR   | VADV | VI | SS | IG | DV | SV | SR |
| QWY16124.1  | GR   | VADV | VI | SS | IG | DV | SV | SR |
| QWY16121.1  | GR   | VADV | VI | SS | IG | DV | SV | SR |
| QWY16118.1  | GR   | VADV | VI | SS | IG | DV | SV | SR |
| QWY16117.1  | GR   | VADV | VI | SS | IG | DV | SV | SR |
| QWY16116.1  | GR   | VADV | VI | SS | IG | DV | SV | SR |
| QWY16115.1  | GR   | VADV | VI | SS | IG | DV | SV | SR |
| QWY16096.1  | GR   | VADV | VI | SS | IG | DV | SV | SR |
| QWY16095.1  | GR   | VADV | VI | SS | IG | DV | SV | SR |
| QWY16085.1  | GR   | VADV | VI | SS | IG | DV | SV | SR |
| QWY16077.1  | GR   | VADV | VI | SS | IG | DV | SV | SR |
| QWY16072.1  | GR   | VADV | VI | SS | IG | DV | SV | SR |
| QWY16071.1  | GR   | VADV | VI | SS | IG | DV | SV | SR |
| QWY16064.1  | GR   | VADV | VI | SS | IG | DV | SV | SR |
| QWY16059.1  | GR   | VADV | VI | SS | IG | DV | SV | SR |
| QWY16054.1  | GR   | VADV | VI | SS | IG | DV | SV | SR |
| QWY16052.1  | GR   | VADV | VI | SS | IG | DV | SV | SR |
| QWY16051.1  | GR   | VADV | VI | SS | IG | DV | SV | SR |
| QWY16049.1  | GR   | VADV | VI | SS | IG | DV | SV | SR |
| QWY16046.1  | GR   | VADV | VI | SS | IG | DV | SV | SR |
| QWY16045.1  | GR   | VADV | VI | SS | IG | DV | SV | SR |
| QWY16041.1  | GR   | VADV | VI | SS | IG | DV | SV | SR |
| QWY16040.1  | GR   | VADV | VI | SS | IG | DV | SV | SR |
| QWY16039.1  | GR   | VADV | VI | SS | IG | DV | SV | SR |
| QWY16017.1  | GR   | VADV | VI | SS | IG | DV | SV | SR |
| QWY16016.1  | GR   | VADV | VI | SS | IG | DV | SV | SR |
| QWY16015.1  | GR   | VADV | VI | SS | IG | DV | SV | SR |
| QTA73890.1  | GR   | VADV | VI | SS | IG | DV | SV | SR |
| QWY13885.1  | GR   | VADV | VI | SS | IG | DV | SV | SR |
| QWY13884.1  | GR   | VADV | VI | SS | IG | DV | SV | SR |
| BBU37474.1  | GR   | VADV | VI | SS | IG | DV | SV | SR |
| BBU37473.1  | GR   | VADV | VI | SS | IG | DV | SV | SR |
| BBU37471.1  | GR   | VADV | VI | SS | IG | DV | SV | SR |
| BBU37469.1  | GR   | VADV | VI | SS | IG | DV | SV | SR |
| BBU37468.1  | GR   | VADV | VI | SS | IG | DV | SV | SR |
| BBU37467.1  | GR   | VADV | VI | SS | IG | DV | SV | SR |
| BBU37466.1  | GR   | VADV | VI | SS | IG | DV | SV | SR |
| BBU37465.1  | GR   | VADV | VI | SS | IG | DV | SV | SR |
| BBU37464.1  | GR   | VADV | VI | SS | IG | DV | SV | SR |
| BBU37463.1  | GR   | VADV | VI | SS | IG | DV | SV | SR |
| QWY16038.1  | GR   | VADV | VI | SS | IG | DV | SV | SR |
| QOP74907.1  | GR   | VADV | VI | SS | IG | DV | SV | SR |
| QOP74903.1  | GR   | VADV | VI | SS | IG | DV | SV | SR |
| QOP74902.1  | GR   | VADV | VI | SS | IG | DV | SV | SR |
| QOP74899.1  | GR   | VADV | VI | SS | IG | DV | SV | SR |
| QOP74896.1  | GR   | VADV | VI | SS | IG | DV | SV | SR |
| QWY16037.1  | GR   | VADV | VI | SS | IG | DV | SV | SR |
| QUS47932.1  | GR   | VADV | VI | SS | IG | DV | SV | SR |
| QWY16136.1  | GR   | VADV | VI | SS | IG | DV | SV | SR |
| QWY16044.1  | GR   | VADV | VI | SS | IG | DV | SV | SR |
| QUS47923.1  | GR   | VADV | VI | SS | IG | DV | SV | SR |
| QWY16152.1  | GR   | VADV | VI | SS | IG | DV | SV | SR |
| QWY16151.1  | GR   | VADV | VI | SS | IG | DV | SV | SR |
| QWY16018.1  | GR   | VADV | VI | SS | IG | DV | SV | SR |
| BBU37475.1  | GR   | VADV | VI | SS | IG | DV | SV | SR |
| QUS47938.1  | GR   | VADV | VI | SS | IG | DV | SV | SR |
| QWY16076.1  | GR   | VADV | VI | SS | IG | DV | SV | SR |
| QWY16073.1  | GR   | VADV | VI | SS | IG | DV | SV | SR |
| QOP74905.1  | GR   | VADV | VI | SS | IG | DV | SV | SR |
| QWY16160.1  | GR   | VADV | VI | SS | IG | DV | SV | SR |
| QWY16070.1  | GR   | VADV | VI | SS | IG | DV | SV | SR |
| QWY16068.1  | GR   | VADV | VI | SS | IG | DV | SV | SR |
| QWY16066.1  | GR   | VADV | VI | SS | IG | DV | SV | SR |
| QWY16065.1  | GR   | VADV | VI | SS | IG | DV | SV | SR |
| QWY16034.1  | GR   | VADV | VI | SS | IG | DV | SV | SR |
| QTA73887.1  | GR   | VADV | VI | SS | IG | DV | SV | SR |
| QTA73883.1  | GR   | VADV | VI | SS | IG | DV | SV | SR |
| BBU37478.1  | GR   | VADV | VI | SS | IG | DV | SV | SR |
| BBU37470.1  | GR   | VADV | VI | SS | IG | DV | SV | SR |
| QWY16033.1  | GR   | VADV | VI | SS | IG | DV | SV | SR |
| QWY16065.1  | GR   | VADV | VI | SS | IG | DV | SV | SR |
| QTA73886.1  | GR   | VADV | VI | SS | IG | DV | SV | SR |
| QWY16113.1  | GR   | VADV | VI | SS | IG | DV | SV | SR |
| QWY16111.1  | GR   | VADV | VI | SS | IG | DV | SV | SR |
| QWY16109.1  | GR   | VADV | VI | SS | IG | DV | SV | SR |
| QWY16060.1  | GR   | VADV | VI | SS | IG | DV | SV | SR |
| QUS47945.1  | GR   | VADV | VI | SS | IG | DV | SV | SR |
| QOP74904.1  | GR   | VADV | VI | SS | IG | DV | SV | SR |
| QUS47924.1  | GR   | VADV | VI | SS | IG | DV | SV | SR |
| QWY15991.1  | GR   | VADV | VI | SS | IG | DV | SV | SR |
| QWY16032.1  | GR   | VADV | VI | SS | IG | DV | SV | SR |
| QWY16165.1  | GR   | VADV | VI | SS | IG | DV | SV | SR |
| QWY16038.1  | GR   | VADV | VI | SS | IG | DV | SV | SR |

[illegible]

[illegible]



[illegible]

[illegible]

[illegible]



[illegible]

[illegible]



[illegible]

[illegible]

[illegible]



QWY16174.1 . . . . .GDP|IADIIEGAVTQTTNR|.AISGPIQPVTAANTQSSSHRLGTGOVPALQANETGATSNATDESMIETRQVNVNRHG  
QWY16171.1 . . . . .GDP|IADIIEGAVTQTTNR|.AISGPIQPVTAANTQSSSHRLGTGOVPALQANETGATSNATDESMIETRQVNVNRHG  
QWY16173.1 . . . . .GDP|IADIIEGAVTQTTNR|.AISGPIQPVTAANTQSSSHRLGTGOVPALQANETGATSNATDESMIETRQVNVNRHG  
QWY16172.1 . . . . .GDP|IADIIEGAVTQTTNR|.AISGPIQPVTAANTQSSSHRLGTGOVPALQANETGATSNATDESMIETRQVNVNRHG  
QWY16170.1 . . . . .GDP|IADIIEGAVTQTTNR|.AISGPIQPVTAANTQSSSHRLGTGOVPALQANETGATSNATDESMIETRQVNVNRHG  
QWY16169.1 . . . . .GDP|IADIIEGAVTQTTNR|.AISGPIQPVTAANTQSSSHRLGTGOVPALQANETGATSNATDESMIETRQVNVNRHG  
QWY16168.1 . . . . .GDP|IADIIEGAVTQTTNR|.AISGPIQPVTAANTQSSSHRLGTGOVPALQANETGATSNATDESMIETRQVNVNRHG  
QXF31588.1 . . . . .GDTVSDMIENSINRITN|.AISTTQTHQTAADTRVSNHRLGTGEVPALQANETGATSNATDESMIETRQVNVNRHG  
QXF31587.1 . . . . .GDTVSDMIENSINRITN|.AISTTQTHQTAADTRVSNHRLGTGEVPALQANETGATSNATDESMIETRQVNVNRHG  
pdb|6110|A . . . . .GDPVEDIIHDALGNTARR|.AISGATNVEESAADTTPSSHRLGTGRVPALQANETGATSNATDESMIETRQVNVNRHG  
pdb|611J|A . . . . .GDPVEDIIHDALGNTARR|.AISGATNVEESAADTTPSSHRLGTGRVPALQANETGATSNATDESMIETRQVNVNRHG  
pdb|6AKS|A . . . . .GDPVEDIIHDALGNTARR|.AISGATNVEESAADTTPSSHRLGTGRVPALQANETGATSNATDESMIETRQVNVNRHG  
BCD33944.1 . . . . .RPGISQEAVLQAPEDATNGALTGIIINNIPTAANTTESHHNISTSATPALQANETGATSNATDESMIETRQVNVNRHG  
pdb|7ECY|A . . . . .IESIIKTATDT|. . . . .VKSEIN..AELG. . . . .VVPSLNAWETGATSNTEPEEAIQTRIVINOHG  
pdb|7EC5|A . . . . .IESIIKTATDT|. . . . .VKSEIN..AELG. . . . .VVPSLNAWETGATSNTEPEEAIQTRIVINOHG  
pdb|7EBZ|A . . . . .IESIIKTATDT|. . . . .VKSEIN..AELG. . . . .VVPSLNAWETGATSNTEPEEAIQTRIVINOHG  
pdb|7EBR|A . . . . .IESIIKTATDT|. . . . .VKSEIN..AELG. . . . .VVPSLNAWETGATSNTEPEEAIQTRIVINOHG  
pdb|6MZI|A . . . . .IESIIKTATDT|. . . . .VKSEIN..AELG. . . . .VVPSLNAWETGATSNTEPEEAIQTRIVINOHG  
pdb|6CSH|A . . . . .IESIIKTATDT|. . . . .VKSEIN..AELG. . . . .VVPSLNAWETGATSNTEPEEAIQTRIVINOHG  
pdb|6CSG|A . . . . .IESIIKTATDT|. . . . .VKSEIN..AELG. . . . .VVPSLNAWETGATSNTEPEEAIQTRIVINOHG  
pdb|6CSA|A . . . . .IESIIKTATDT|. . . . .VKSEIN..AELG. . . . .VVPSLNAWETGATSNTEPEEAIQTRIVINOHG  
pdb|6CS6|A . . . . .IESIIKTATDT|. . . . .VKSEIN..AELG. . . . .VVPSLNAWETGATSNTEPEEAIQTRIVINOHG  
pdb|6CS5|A . . . . .IESIIKTATDT|. . . . .VKSEIN..AELG. . . . .VVPSLNAWETGATSNTEPEEAIQTRIVINOHG  
pdb|6CS4|A . . . . .IESIIKTATDT|. . . . .VKSEIN..AELG. . . . .VVPSLNAWETGATSNTEPEEAIQTRIVINOHG  
pdb|6CS3|A . . . . .IESIIKTATDT|. . . . .VKSEIN..AELG. . . . .VVPSLNAWETGATSNTEPEEAIQTRIVINOHG  
pdb|6CRU|A . . . . .IESIIKTATDT|. . . . .VKSEIN..AELG. . . . .VVPSLNAWETGATSNTEPEEAIQTRIVINOHG  
pdb|6CRS|A . . . . .IESIIKTATDT|. . . . .VKSEIN..AELG. . . . .VVPSLNAWETGATSNTEPEEAIQTRIVINOHG  
pdb|6CRR|A . . . . .IESIIKTATDT|. . . . .VKSEIN..AELG. . . . .VVPSLNAWETGATSNTEPEEAIQTRIVINOHG  
pdb|6CRP|A . . . . .IESIIKTATDT|. . . . .VKSEIN..AELG. . . . .VVPSLNAWETGATSNTEPEEAIQTRIVINOHG  
QNO39042.1 . . . . .IESIIKTATDT|. . . . .VKSEIN..AELG. . . . .VVPSLNAWETGATSNTEPEEAIQTRIVINOHG  
QNO39041.1 . . . . .IESIIKTATDT|. . . . .VKSEIN..AELG. . . . .VVPSLNAWETGATSNTEPEEAIQTRIVINOHG  
QNO39040.1 . . . . .IESIIKTATDT|. . . . .VKSEIN..AELG. . . . .VVPSLNAWETGATSNTEPEEAIQTRIVINOHG  
QNO39038.1 . . . . .IESIIKTATDT|. . . . .VKSEIN..AELG. . . . .VVPSLNAWETGATSNTEPEEAIQTRIVINOHG  
QNO39039.1 . . . . .IESIIKTATDT|. . . . .VKSEIN..AELG. . . . .VVPSLNAWETGATSNTEPEEAIQTRIVINOHG  
CAA1539354.1 . . . . .IESIIKTATDT|. . . . .VKSEIN..AELG. . . . .VVPSLNAWETGATSNTEPEEAIQTRIVINOHG  
CAA1527138.1 . . . . .IESIIKTATDT|. . . . .VKSEIN..AELG. . . . .VVPSLNAWETGATSNTEPEEAIQTRIVINOHG  
CAA1539353.1 . . . . .IESIIKTATDT|. . . . .VKSEIN..AELG. . . . .VVPSLNAWETGATSNTEPEEAIQTRIVINOHG  
CAA1527136.1 . . . . .IESIIKTATDT|. . . . .VKSEIN..AELG. . . . .VVPSLNAWETGATSNTEPEEAIQTRIVINOHG  
QNO39037.1 . . . . .IESIIKTATDT|. . . . .VKSEIN..AELG. . . . .VVPSLNAWETGATSNTEPEEAIQTRIVINOHG  
QKX95883.1 . . . . .LDHLHGAEAAAYQIESIIKTATDT|. . . . .VKSEIN..AELG. . . . .VVPSLNAWETGATSNTEPEEAIQTRIVINOHG  
pdb|5BNP|A . . . . .VESIIKTATDT|. . . . .VKSEIN..AELG. . . . .VVPSLNAWETGATSNTEPEEAIQTRIVINOHG  
pdb|5BNN|A . . . . .VESIIKTATDT|. . . . .VKSEIN..AELG. . . . .VVPSLNAWETGATSNTEPEEAIQTRIVINOHG  
pdb|5BNN|A . . . . .VESIIKTATDT|. . . . .VKSEIN..AELG. . . . .VVPSLNAWETGATSNTEPEEAIQTRIVINOHG  
pdb|5BNN|A . . . . .VESIIKTATDT|. . . . .VKSEIN..AELG. . . . .VVPSLNAWETGATSNTEPEEAIQTRIVINOHG  
pdb|4WM7|A . . . . .VESIIKTATDT|. . . . .VKSEIN..AELG. . . . .VVPSLNAWETGATSNTEPEEAIQTRIVINOHG  
QIC50353.1 . . . . .GIDDDVIDTVVANAALKV|. . . . .SMPQVQNTQSSGP.VNSKEVPALTAWETGATSNTEPEEAIQTRIVINOHG  
QIC50352.1 . . . . .GIDDDVIDTVVANAALKV|. . . . .SMPQVQNTQSSGP.VNSKEVPALTAWETGATSNTEPEEAIQTRIVINOHG  
QIC50356.1 . . . . .GIEDTIDKVVDNAALAL|. . . . .SMPRVQDTQSSGP.VNSKEVPALTAWETGATSNTEPEEAIQTRIVINOHG

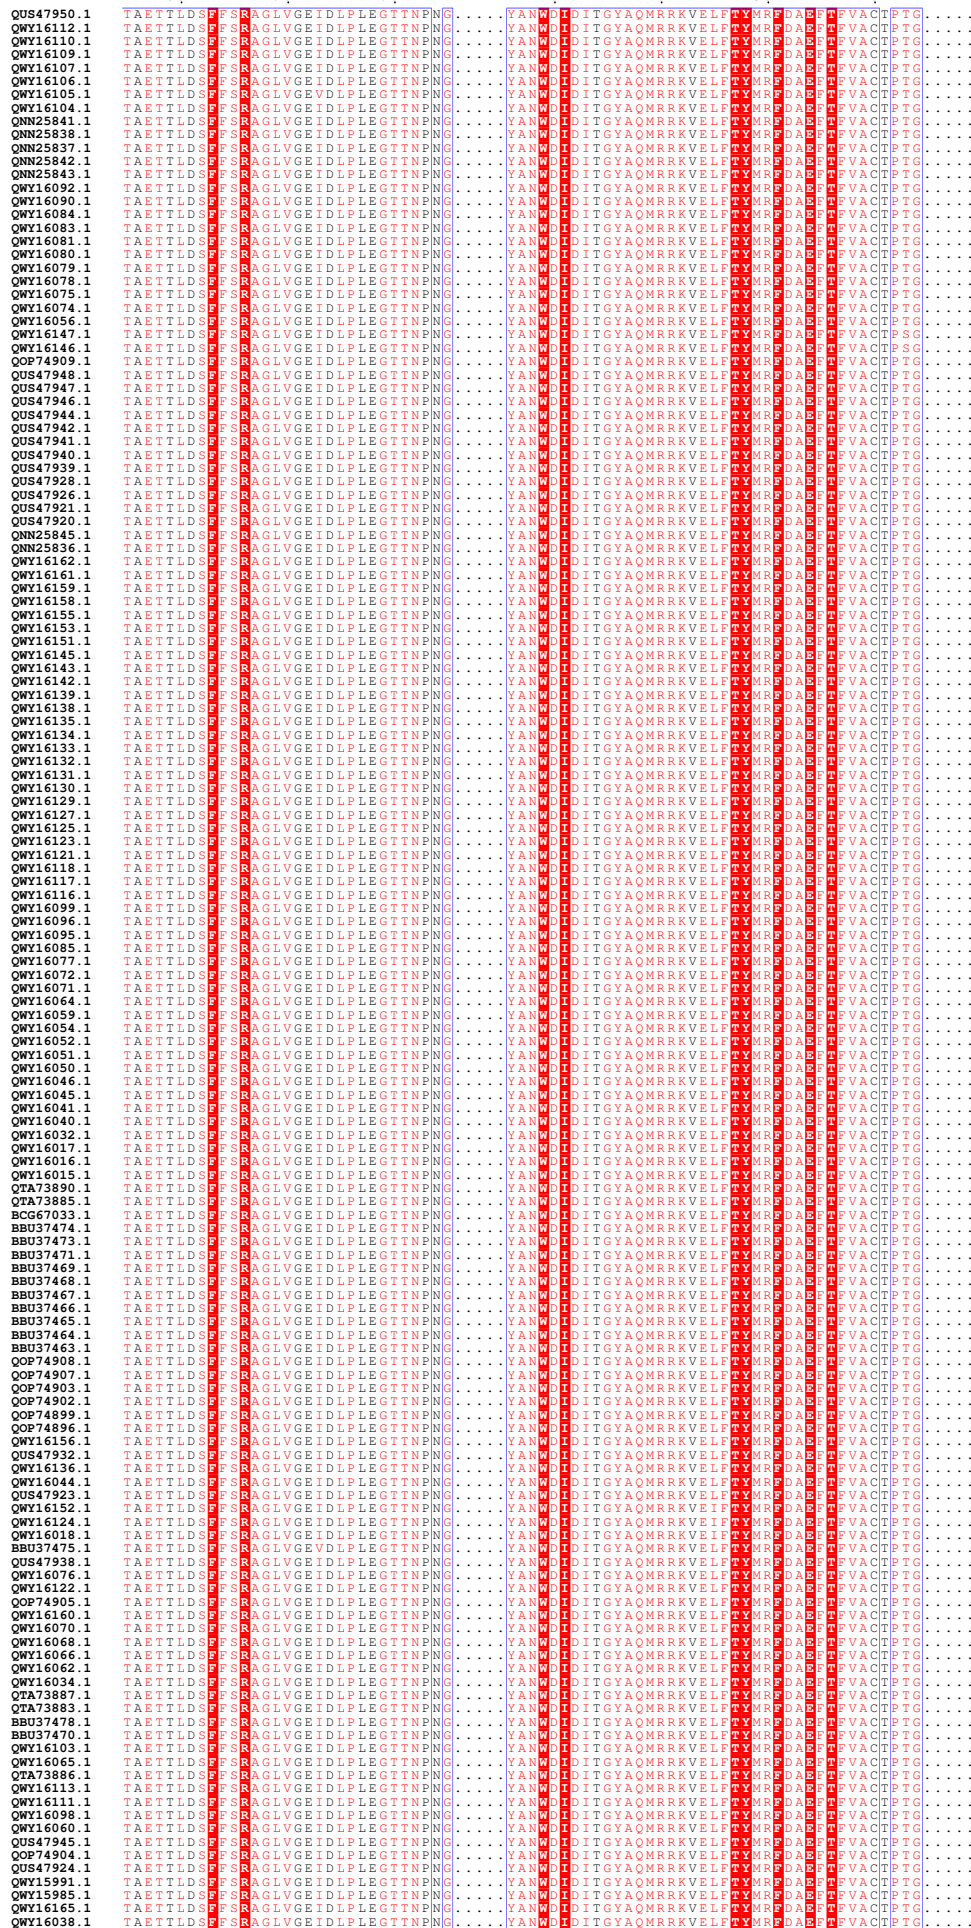

[illegible]



|            |           |       |     |    |    |    |    |    |    |    |      |    |    |   |   |   |   |   |   |   |   |   |   |   |   |   |   |   |   |   |   |   |   |   |   |   |   |
|------------|-----------|-------|-----|----|----|----|----|----|----|----|------|----|----|---|---|---|---|---|---|---|---|---|---|---|---|---|---|---|---|---|---|---|---|---|---|---|---|
| QW474885.1 | TAETITLDS | FFSFR | AGL | VE | ID | LP | LE | GT | TN | PN | YANW | DI | IT | G | Y | A | Q | M | R | R | K | V | E | L | T | M | R | F | D | A | E | T | V | A | C | T | G |
| QW160226.1 | TAETITLDS | FFSFR | AGL | VE | ID | LP | LE | GT | TN | PN | YANW | DI | IT | G | Y | A | Q | M | R | R | K | V | E | L | T | M | R | F | D | A | E | T | V | A | C | T | G |
| QW159777.1 | TAETITLDS | FFSFR | AGL | VE | ID | LP | LE | GT | TN | PN | YANW | DI | IT | G | Y | A | Q | M | R | R | K | V | E | L | T | M | R | F | D | A | E | T | V | A | C | T | G |
| QW173869.1 | TAETITLDS | FFSFR | AGL | VE | ID | LP | LE | GT | TN | PN | YANW | DI | IT | G | Y | A | Q | M | R | R | K | V | E | L | T | M | R | F | D | A | E | T | V | A | C | T | G |
| QUS47935.1 | TAETITLDS | FFSFR | AGL | VE | ID | LP | LE | GT | TN | PN | YANW | DI | IT | G | Y | A | Q | M | R | R | K | V | E | L | T | M | R | F | D | A | E | T | V | A | C | T | G |
| QW16024.1  | TAETITLDS | FFSFR | AGL | VE | ID | LP | LE | GT | TN | PN | YANW | DI | IT | G | Y | A | Q | M | R | R | K | V | E | L | T | M | R | F | D | A | E | T | V | A | C | T | G |
| QW159939.1 | TAETITLDS | FFSFR | AGL | VE | ID | LP | LE | GT | TN | PN | YANW | DI | IT | G | Y | A | Q | M | R | R | K | V | E | L | T | M | R | F | D | A | E | T | V | A | C | T | G |
| QW16022.1  | TAETITLDS | FFSFR | AGL | VE | ID | LP | LE | GT | TN | PN | YANW | DI | IT | G | Y | A | Q | M | R | R | K | V | E | L | T | M | R | F | D | A | E | T | V | A | C | T | G |
| QW16013.1  | TAETITLDS | FFSFR | AGL | VE | ID | LP | LE | GT | TN | PN | YANW | DI | IT | G | Y | A | Q | M | R | R | K | V | E | L | T | M | R | F | D | A | E | T | V | A | C | T | G |
| QW16012.1  | TAETITLDS | FFSFR | AGL | VE | ID | LP | LE | GT | TN | PN | YANW | DI | IT | G | Y | A | Q | M | R | R | K | V | E | L | T | M | R | F | D | A | E | T | V | A | C | T | G |
| QW155992.1 | TAETITLDS | FFSFR | AGL | VE | ID | LP | LE | GT | TN | PN | YANW | DI | IT | G | Y | A | Q | M | R | R | K | V | E | L | T | M | R | F | D | A | E | T | V | A | C | T | G |
| QW15982.1  | TAETITLDS | FFSFR | AGL | VE | ID | LP | LE | GT | TN | PN | YANW | DI | IT | G | Y | A | Q | M | R | R | K | V | E | L | T | M | R | F | D | A | E | T | V | A | C | T | G |
| QW15981.1  | TAETITLDS | FFSFR | AGL | VE | ID | LP | LE | GT | TN | PN | YANW | DI | IT | G | Y | A | Q | M | R | R | K | V | E | L | T | M | R | F | D | A | E | T | V | A | C | T | G |
| QW15976.1  | TAETITLDS | FFSFR | AGL | VE | ID | LP | LE | GT | TN | PN | YANW | DI | IT | G | Y | A | Q | M | R | R | K | V | E | L | T | M | R | F | D | A | E | T | V | A | C | T | G |
| QW173880.1 | TAETITLDS | FFSFR | AGL | VE | ID | LP | LE | GT | TN | PN | YANW | DI | IT | G | Y | A | Q | M | R | R | K | V | E | L | T | M | R | F | D | A | E | T | V | A | C | T | G |
| QW173872.1 | TAETITLDS | FFSFR | AGL | VE | ID | LP | LE | GT | TN | PN | YANW | DI | IT | G | Y | A | Q | M | R | R | K | V | E | L | T | M | R | F | D | A | E | T | V | A | C | T | G |
| QW173868.1 | TAETITLDS | FFSFR | AGL | VE | ID | LP | LE | GT | TN | PN | YANW | DI | IT | G | Y | A | Q | M | R | R | K | V | E | L | T | M | R | F | D | A | E | T | V | A | C | T | G |
| QW174892.1 | TAETITLDS | FFSFR | AGL | VE | ID | LP | LE | GT | TN | PN | YANW | DI | IT | G | Y | A | Q | M | R | R | K | V | E | L | T | M | R | F | D | A | E | T | V | A | C | T | G |
| QW15998.1  |           |       |     |    |    |    |    |    |    |    |      |    |    |   |   |   |   |   |   |   |   |   |   |   |   |   |   |   |   |   |   |   |   |   |   |   |   |

[illegible]

|            |        |     |     |      |    |    |    |    |    |     |    |      |    |    |    |    |    |    |    |    |    |    |    |    |    |    |    |    |   |    |
|------------|--------|-----|-----|------|----|----|----|----|----|-----|----|------|----|----|----|----|----|----|----|----|----|----|----|----|----|----|----|----|---|----|
| QWY15692.1 | TQETAI | GNF | FSR | RAGL | VS | IT | MP | TT | GT | QNT | DG | YVNW | WD | DL | MG | YA | QL | RR | KK | CE | LL | TY | MR | FD | AE | TE | VV | AA | K | NG |
| QWY15691.1 | TQETAI | GNF | FSR | RAGL | VS | IT | MP | TT | GT | QNT | DG | YVNW | WD | DL | MG | YA | QL | RR | KK | CE | LL | TY | MR | FD | AE | TE | VV | AA | K | NG |
| QWY15691.1 | TQETAI | GNF | FSR | RAGL | VS | IT | MP | TT | GT | QNT | DG | YVNW | WD | DL | MG | YA | QL | RR | KK | CE | LL | TY | MR | FD | AE | TE | VV | AA | K | NG |
| QWY15690.1 | TQETAI | GNF | FSR | RAGL | VS | IT | MP | TT | GT | QNT | DG | YVNW | WD | DL | MG | YA | QL | RR | KK | CE | LL | TY | MR | FD | AE | TE | VV | AA | K | NG |
| QWY15696.1 | TQETAI | GNF | FSR | RAGL | VS | IT | MP | TT | GT | QNT | DG | YVNW | WD | DL | MG | YA | QL | RR | KK | CE | LL | TY | MR | FD | AE | TE | VV | AA | K | NG |
| QWY15695.1 | TQETAI | GNF | FSR | RAGL | VS | IT | MP | TT | GT | QNT | DG | YVNW | WD | DL | MG | YA | QL | RR | KK | CE | LL | TY | MR | FD | AE | TE | VV | AA | K | NG |
| QWY15694.1 | TQETAI | GNF | FSR | RAGL | VS | IT | MP | TT | GT | QNT | DG | YVNW | WD | DL | MG | YA | QL | RR | KK | CE | LL | TY | MR | FD | AE | TE | VV | AA | K | NG |
| QWY15678.1 | TQETAI | GNF | FSR | RAGL | VS | IT | MP | TT | GT | QNT | DG | YVNW | WD | DL | MG | YA | QL | RR | KK | CE | LL | TY | MR | FD | AE | TE | VV | AA | K | NG |
| QWY15703.1 | TQETAI | GNF | FSR | RAGL | VS | IT | MP | TT | GT | QNT | DG | YVNW | WD | DL | MG | YA | QL | RR | KK | CE | LL | TY | MR | FD | AE | TE | VV | AA | K | NG |
| QWY15701.1 | TQETAI | GNF | FSR | RAGL | VS | IT | MP | TT | GT | QNT | DG | YVNW | WD | DL | MG | YA | QL | RR | KK | CE | LL | TY | MR | FD | AE | TE | VV | AA | K | NG |
| QWY15699.1 | TQETAI | GNF | FSR | RAGL | VS | IT | MP | TT | GT | QNT | DG | YVNW | WD | DL | MG | YA | QL | RR | KK | CE | LL | TY | MR | FD | AE | TE | VV | AA | K | NG |
| QWY15673.1 | TQETAI | GNF | FSR | RAGL | VS | IT | MP | TT | GT | QNT | DG | YVNW | WD | DL | MG | YA | QL | RR | KK | CE | LL | TY | MR | FD | AE | TE | VV | AA | K | NG |
| QWY15672.1 | TQETAI | GNF | FSR | RAGL | VS | IT | MP | TT | GT | QNT | DG | YVNW | WD | DL | MG | YA | QL | RR | KK | CE | LL | TY | MR | FD | AE | TE | VV | AA | K | NG |
| QWY15714.1 | TQETAI | GNF | FSR | RAGL | VS | IT | MP | TT | GT | QNT | DG | YVNW | WD | DL | MG | YA | QL | RR | KK | CE | LL | TY | MR | FD | AE | TE | VV | AA | K | NG |
| QWY15706.1 | TQETAI | GNF | FSR | RAGL | VS | IT | MP | TT | GT | QNT | DG | YVNW | WD | DL | MG | YA | QL | RR | KK | CE | LL | TY | MR | FD | AE | TE | VV | AA | K | NG |
| QWY15705.1 | TQETAI | GNF | FSR | RAGL | VS | IT | MP | TT | GT | QNT | DG | YVNW | WD | DL | MG | YA | QL | RR | KK | CE | LL | TY | MR | FD | AE | TE | VV | AA | K | NG |
| QTA73914.1 | TQETAI | GNF | FSR | RAGL | VS | IT | MP | TT | GT | QNT | DG | YVNW | WD | DL | MG | YA | QL | RR | KK | CE | LL | TY | MR | FD | AE | TE | VV | AA | K | NG |
| QWY15748.1 | TQETAI | GNF | FSR | RAGL | VS | IT | MP | TT | GT | QNT | DG | YVNW | WD | DL | MG | YA | QL | RR | KK | CE | LL | TY | MR | FD | AE | TE | VV | AA | K | NG |
| QWF08837.1 | TQETAI | GNF | FSR | RAGL | VS | IT | MP | TT | GT | QNT | DG | YVNW | WD | DL | MG | YA | QL | RR | KK | CE | LL | TY | MR | FD | AE | TE | VV | AA | K | NG |
| QWF08804.1 | TQETAI | GNF | FSR | RAGL | VS | IT | MP | TT | GT | QNT | DG | YVNW | WD | DL | MG | YA | QL | RR | KK | CE | LL | TY | MR | FD | AE | TE | V  |    |   |    |



|            |    |    |    |    |    |    |    |    |    |    |    |    |    |    |    |    |    |    |    |    |    |    |    |    |    |    |    |    |    |    |    |    |    |    |    |
|------------|----|----|----|----|----|----|----|----|----|----|----|----|----|----|----|----|----|----|----|----|----|----|----|----|----|----|----|----|----|----|----|----|----|----|----|
| QWY15732.1 | TQ | TA | IG | NI | GN | FF | SR | AG | LV | SI | IT | MP | TT | GT | GN | DG | YV | ND | DL | MG | YA | QL | RR | KK | CE | LT | YR | MF | FA | DE | TE | VV | AA | KP | NG |
| QWY15731.1 | TQ | TA | IG | NI | GN | FF | SR | AG | LV | SI | IT | MP | TT | GT | GN | DG | YV | ND | DL | MG | YA | QL | RR | KK | CE | LT | YR | MF | FA | DE | TE | VV | AA | KP | NG |
| QWY15780.1 | TQ | TA | IG | NI | GN | FF | SR | AG | LV | SI | IT | MP | TT | GT | GN | DG | YV | ND | DL | MG | YA | QL | RR | KK | CE | LT | YR | MF | FA | DE | TE | VV | AA | KP | NG |
| QWY15779.1 | TQ | TA | IG | NI | GN | FF | SR | AG | LV | SI | IT | MP | TT | GT | GN | DG | YV | ND | DL | MG | YA | QL | RR | KK | CE | LT | YR | MF | FA | DE | TE | VV | AA | KP | NG |
| BCG67006.1 | TQ | TA | IG | NI | GN | FF | SR | AG | LV | SI | IT | MP | TT | GT | GN | DG | YV | ND | DL | MG | YA | QL | RR | KK | CE | LT | YR | MF | FA | DE | TE | VV | AA | KP | NG |
| BCG67004.1 | TQ | TA | IG | NI | GN | FF | SR | AG | LV | SI | IT | MP | TT | GT | GN | DG | YV | ND | DL | MG | YA | QL | RR | KK | CE | LT | YR | MF | FA | DE | TE | VV | AA | KP | NG |
| QWY15778.1 | TQ | TA | IG | NI | GN | FF | SR | AG | LV | SI | IT | MP | TT | GT | GN | DG | YV | ND | DL | MG | YA | QL | RR | KK | CE | LT | YR | MF | FA | DE | TE | VV | AA | KP | NG |
| BCG67007.1 | TQ | TA | IG | NI | GN | FF | SR | AG | LV | SI | IT | MP | TT | GT | GN | DG | YV | ND | DL | MG | YA | QL | RR | KK | CE | LT | YR | MF | FA | DE | TE | VV | AA | KP | NG |
| BCG67036.1 | TQ | TA | IG | NI | GN | FF | SR | AG | LV | SI | IT | MP | TT | GT | GN | DG | YV | ND | DL | MG | YA | QL | RR | KK | CE | LT | YR | MF | FA | DE | TE | VV | AA | KP | NG |
| BCG67035.1 | TQ | TA | IG | NI | GN | FF | SR | AG | LV | SI | IT | MP | TT | GT | GN | DG | YV | ND | DL | MG | YA | QL | RR | KK | CE | LT | YR | MF | FA | DE | TE | VV | AA | KP | NG |
| QWY15785.1 | TQ | TA | IG | NI | GN | FF | SR | AG | LV | SI | IT | MP | TT | GT | GN | DG | YV | ND | DL | MG | YA | QL | RR | KK | CE | LT | YR | MF | FA | DE | TE | VV | AA | KP | NG |
| QWY15784.1 | TQ | TA | IG | NI | GN | FF | SR | AG | LV | SI | IT | MP | TT | GT | GN | DG | YV | ND | DL | MG | YA | QL | RR | KK | CE | LT | YR | MF | FA | DE | TE | VV | AA | KP | NG |
| QWY15783.1 | TQ | TA | IG | NI | GN | FF | SR | AG | LV | SI | IT | MP | TT | GT | GN | DG | YV | ND | DL | MG | YA | QL | RR | KK | CE | LT | YR | MF | FA | DE | TE | VV | AA | KP | NG |
| QYCE5159.1 | TQ | TA | IG | NI | GN | FF | SR | AG | LV | SI | IT | MP | TT | GT | GN | DG | YV | ND | DL | MG | YA | QL | RR | KK | CE | LT | YR | MF | FA | DE | TE | VV | AA | KP | NG |
| BCR43101.1 | TQ | TA | IG | NI | GN | FF | SR | AG | LV | SI | IT | MP | TT | GT | GN | DG | YV | ND | DL | MG | YA | QL | RR | KK | CE | LT | YR | MF | FA | DE | TE | VV | AA | KP | NG |
| BCR43309.1 | TQ | TA | IG | NI | GN | FF | SR | AG | LV | SI | IT | MP | TT | GT | GN | DG | YV | ND | DL | MG | YA | QL | RR | KK | CE | LT | YR | MF | FA | DE | TE | VV | AA | KP | NG |
| QWY15873.1 | TQ | TA | IG | NI | GN | FF | SR | AG | LV | SI | IT | MP | TT | GT | GN | DG | YV | ND | DL | MG | YA | QL | RR | KK | CE | LT | YR | MF | FA | DE | TE | VV | AA | KP | NG |
| QWY15870.1 | TQ | TA | IG | NI | GN | FF | SR | AG | LV | SI | IT | MP | TT | GT | GN | DG | YV | ND | DL | MG | YA | QL | RR | KK | CE | LT |    |    |    |    |    |    |    |    |    |

[illegible]

|            |        |     |     |       |      |    |    |    |     |    |      |    |    |      |     |    |    |    |    |    |    |    |    |    |    |    |   |    |
|------------|--------|-----|-----|-------|------|----|----|----|-----|----|------|----|----|------|-----|----|----|----|----|----|----|----|----|----|----|----|---|----|
| QWY15824.1 | TQETAI | GNF | FSR | RAGLV | SIIT | MP | TT | GT | QNT | DG | YVNW | WD | DL | MGYA | QAL | RR | KK | CE | LL | TY | MR | FD | AE | TE | VV | AA | K | NG |
| QWY15823.1 | TQETAI | GNF | FSR | RAGLV | SIIT | MP | TT | GT | QNT | DG | YVNW | WD | DL | MGYA | QAL | RR | KK | CE | LL | TY | MR | FD | AE | TE | VV | AA | K | NG |
| QWY15822.1 | TQETAI | GNF | FSR | RAGLV | SIIT | MP | TT | GT | QNT | DG | YVNW | WD | DL | MGYA | QAL | RR | KK | CE | LL | TY | MR | FD | AE | TE | VV | AA | K | NG |
| QWY15821.1 | TQETAI | GNF | FSR | RAGLV | SIIT | MP | TT | GT | QNT | DG | YVNW | WD | DL | MGYA | QAL | RR | KK | CE | LL | TY | MR | FD | AE | TE | VV | AA | K | NG |
| QWY15816.1 | TQETAI | GNF | FSR | RAGLV | SIIT | MP | TT | GT | QNT | DG | YVNW | WD | DL | MGYA | QAL | RR | KK | CE | LL | TY | MR | FD | AE | TE | VV | AA | K | NG |
| QWY15778.1 | TQETAI | GNF | FSR | RAGLV | SIIT | MP | TT | GT | QNT | DG | YVNW | WD | DL | MGYA | QAL | RR | KK | CE | LL | TY | MR | FD | AE | TE | VV | AA | K | NG |
| QWY15777.1 | TQETAI | GNF | FSR | RAGLV | SIIT | MP | TT | GT | QNT | DG | YVNW | WD | DL | MGYA | QAL | RR | KK | CE | LL | TY | MR | FD | AE | TE | VV | AA | K | NG |
| QWY15791.1 | TQETAI | GNF | FSR | RAGLV | SIIT | MP | TT | GT | QNT | DG | YVNW | WD | DL | MGYA | QAL | RR | KK | CE | LL | TY | MR | FD | AE | TE | VV | AA | K | NG |
| QWY15775.1 | TQETAI | GNF | FSR | RAGLV | SIIT | MP | TT | GT | QNT | DG | YVNW | WD | DL | MGYA | QAL | RR | KK | CE | LL | TY | MR | FD | AE | TE | VV | AA | K | NG |
| QWY15774.1 | TQETAI | GNF | FSR | RAGLV | SIIT | MP | TT | GT | QNT | DG | YVNW | WD | DL | MGYA | QAL | RR | KK | CE | LL | TY | MR | FD | AE | TE | VV | AA | K | NG |
| BCR43107.1 | TQETAI | GNF | FSR | RAGLV | SIIT | MP | TT | GT | QNT | DG | YVNW | WD | DL | MGYA | QAL | RR | KK | CE | LL | TY | MR | FD | AE | TE | VV | AA | K | NG |
| QWY6583.1  | TQETAI | GNF | FSR | RAGLV | SIIT | MP | TT | GT | QNT | DG | YVNW | WD | DL | MGYA | QAL | RR | KK | CE | LL | TY | MR | FD | AE | TE | VV | AA | K | NG |
| QWY3089.1  | TQETAI | GNF | FSR | RAGLV | SIIT | MP | TT | GT | QNT | DG | YVNW | WD | DL | MGYA | QAL | RR | KK | CE | LL | TY | MR | FD | AE | TE | VV | AA | K | NG |
| BCR43081.1 | TQETAI | GNF | FSR | RAGLV | SIIT | MP | TT | GT | QNT | DG | YVNW | WD | DL | MGYA | QAL | RR | KK | CE | LL | TY | MR | FD | AE | TE | VV | AA | K | NG |
| BCG67017.1 | TQETAI | GNF | FSR | RAGLV | SIIT | MP | TT | GT | QNT | DG | YVNW | WD | DL | MGYA | QAL | RR | KK | CE | LL | TY | MR | FD | AE | TE | VV | AA | K | NG |
| BCG67015.1 | TQETAI | GNF | FSR | RAGLV | SIIT | MP | TT | GT | QNT | DG | YVNW | WD | DL | MGYA | QAL | RR | KK | CE | LL | TY | MR | FD | AE | TE | VV | AA | K | NG |
| BCG67007.1 | TQETAI | GNF | FSR | RAGLV | SIIT | MP | TT | GT | QNT | DG | YVNW | WD | DL | MGYA | QAL | RR | KK | CE | LL | TY | MR | FD | AE | TE | VV | AA | K | NG |
| BCG6701.1  | TQETAI | GNF | FSR | RAGLV | SIIT | MP | TT | GT | QNT | DG | YVNW | WD | DL | MGYA | QAL | RR | KK | CE | LL | TY | MR | FD | AE | TE | VV | AA | K | NG |
| QWY5184.1  | TQETAI | GNF | FSR | RAGLV | SIIT | MP | TT | GT | QNT | DG | YVNW | WD | DL | MGYA | QAL | RR | KK | CE | LL | TY | MR | FD | AE | TE | VV | AA | K | NG |
| QWY08853.1 | TQETAI | GNF | FSR | RAGLV | SIIT | MP | TT | GT | QNT | DG | YVNW | WD | DL | MGYA | QAL | RR | KK | CE | LL | TY | MR | FD | AE | TE | VV | AA | K | NG |
| QYCE5140.1 | TQETAI | GNF | FSR | RAGLV | SIIT | MP | TT | GT | QNT | DG | YVNW | WD | DL | MGYA | QAL | RR | KK | CE | LL | TY | MR | FD | AE |    |    |    |   |    |



[illegible]

[illegible]

[illegible]



[illegible]

|            |    | $\beta E$  | $T_T$ | $T_T$ | $n_3$ | $\beta F$ | $T_T$ | $\beta G$ | $\beta H$ | $n_4$ |   |   |   |   |   |   |   |   |   |   |   |   |   |   |   |   |   |   |   |   |   |   |   |   |   |   |   |   |   |   |   |     |   |   |   |   |   |   |   |   |   |   |   |   |    |
|------------|----|------------|-------|-------|-------|-----------|-------|-----------|-----------|-------|---|---|---|---|---|---|---|---|---|---|---|---|---|---|---|---|---|---|---|---|---|---|---|---|---|---|---|---|---|---|---|-----|---|---|---|---|---|---|---|---|---|---|---|---|----|
|            |    | 150        | 170   | 170   | 222   | 180       | 190   | 200       | 210       | 222   |   |   |   |   |   |   |   |   |   |   |   |   |   |   |   |   |   |   |   |   |   |   |   |   |   |   |   |   |   |   |   |     |   |   |   |   |   |   |   |   |   |   |   |   |    |
| QUS47950.1 | .. | EVVVPOLLOQ | M     | V     | P     | G         | A     | K         | P         | D     | S | R | E | S | L | A | W | T | A | T | N | S | V | F | V | K | L | S | D | P | A | Q | V | S | F | F | M | S | P | A | S | A   | Y | W | Y | D | G | F | T | T | G | E | H | K | .. |
| QWY16112.1 | .. | EVVVPOLLOQ | M     | V     | P     | G         | A     | K         | P         | D     | S | R | E | S | L | A | W | T | A | T | N | S | V | F | V | K | L | S | D | P | A | Q | V | S | F | F | M | S | P | A | S | A   | Y | W | Y | D | G | F | T | T | G | E | H | K | .. |
| QWY16110.1 | .. | EVVVPOLLOQ | M     | V     | P     | G         | A     | K         | P         | D     | S | R | E | S | L | A | W | T | A | T | N | S | V | F | V | K | L | S | D | P | A | Q | V | S | F | F | M | S | P | A | S | A   | Y | W | Y | D | G | F | T | T | G | E | H | K | .. |
| QWY16109.1 | .. | EVVVPOLLOQ | M     | V     | P     | G         | A     | K         | P         | D     | S | R | E | S | L | A | W | T | A | T | N | S | V | F | V | K | L | S | D | P | A | Q | V | S | F | F | M | S | P | A | S | A   | Y | W | Y | D | G | F | T | T | G | E | H | K | .. |
| QWY16107.1 | .. | EVVVPOLLOQ | M     | V     | P     | G         | A     | K         | P         | D     | S | R | E | S | L | A | W | T | A | T | N | S | V | F | V | K | L | S | D | P | A | Q | V | S | F | F | M | S | P | A | S | A   | Y | W | Y | D | G | F | T | T | G | E | H | K | .. |
| QWY16106.1 | .. | EVVVPOLLOQ | M     | V     | P     | G         | A     | K         | P         | D     | S | R | E | S | L | A | W | T | A | T | N | S | V | F | V | K | L | S | D | P | A | Q | V | S | F | F | M | S | P | A | S | A   | Y | W | Y | D | G | F | T | T | G | E | H | K | .. |
| QWY16105.1 | .. | EVVVPOLLOQ | M     | V     | P     | G         | A     | K         | P         | D     | S | R | E | S | L | A | W | T | A | T | N | S | V | F | V | K | L | S | D | P | A | Q | V | S | F | F | M | S | P | A | S | A   | Y | W | Y | D | G | F | T | T | G | E | H | K | .. |
| QWY16104.1 | .. | EVVVPOLLOQ | M     | V     | P     | G         | A     | K         | P         | D     | S | R | E | S | L | A | W | T | A | T | N | S | V | F | V | K | L | S | D | P | A | Q | V | S | F | F | M | S | P | A | S | A   | Y | W | Y | D | G | F | T | T | G | E | H | K | .. |
| QNN25841.1 | .. | EVVVPOLLOQ | M     | V     | P     | G         | A     | K         | P         | D     | S | R | E | S | L | A | W | T | A | T | N | S | V | F | V | K | L | S | D | P | A | Q | V | S | F | F | M | S | P | A | S | A   | Y | W | Y | D | G | F | T | T | G | E | H | K | .. |
| QNN25838.1 | .. | EVVVPOLLOQ | M     | V     | P     | G         | A     | K         | P         | D     | S | R | E | S | L | A | W | T | A | T | N | S | V | F | V | K | L | S | D | P | A | Q | V | S | F | F | M | S | P | A | S | A   | Y | W | Y | D | G | F | T | T | G | E | H | K | .. |
| QNN25837.1 | .. | EVVVPOLLOQ | M     | V     | P     | G         | A     | K         | P         | D     | S | R | E | S | L | A | W | T | A | T | N | S | V | F | V | K | L | S | D | P | A | Q | V | S | F | F | M | S | P | A | S | A   | Y | W | Y | D | G | F | T | T | G | E | H | K | .. |
| QNN25843.1 | .. | EVVVPOLLOQ | M     | V     | P     | G         | A     | K         | P         | D     | S | R | E | S | L | A | W | T | A | T | N | S | V | F | V | K | L | S | D | P | A | Q | V | S | F | F | M | S | P | A | S | A   | Y | W | Y | D | G | F | T | T | G | E | H | K | .. |
| QWY16092.1 | .. | EVVVPOLLOQ | M     | V     | P     | G         | A     | K         | P         | D     | S | R | E | S | L | A | W | T | A | T | N | S | V | F | V | K | L | S | D | P | A | Q | V | S | F | F | M | S | P | A | S | A   | Y | W | Y | D | G | F | T | T | G | E | H | K | .. |
| QWY16090.1 | .. | EVVVPOLLOQ | M     | V     | P     | G         | A     | K         | P         | D     | S | R | E | S | L | A | W | T | A | T | N | S | V | F | V | K | L | S | D | P | A | Q | V | S | F | F | M | S | P | A | S | A   | Y | W | Y | D | G | F | T | T | G | E | H | K | .. |
| QWY16084.1 | .. | EVVVPOLLOQ | M     | V     | P     | G         | A     | K         | P         | D     | S | R | E | S | L | A | W | T | A | T | N | S | V | F | V | K | L | S | D | P | A | Q | V | S | F | F | M | S | P | A | S | A   | Y | W | Y | D | G | F | T | T | G | E | H | K | .. |
| QWY16083.1 | .. | EVVVPOLLOQ | M     | V     | P     | G         | A     | K         | P         | D     | S | R | E | S | L | A | W | T | A | T | N | S | V | F | V | K | L | S | D | P | A | Q | V | S | F | F | M | S | P | A | S | A   | Y | W | Y | D | G | F | T | T | G | E | H | K | .. |
| QWY16082.1 | .. | EVVVPOLLOQ | M     | V     | P     | G         | A     | K         | P         | D     | S | R | E | S | L | A | W | T | A | T | N | S | V | F | V | K | L | S | D | P | A | Q | V | S | F | F | M | S | P | A | S | A   | Y | W | Y | D | G | F | T | T | G | E | H | K | .. |
| QWY16080.1 | .. | EVVVPOLLOQ | M     | V     | P     | G         | A     | K         | P         | D     | S | R | E | S | L | A | W | T | A | T | N | S | V | F | V | K | L | S | D | P | A | Q | V | S | F | F | M | S | P | A | S | A   | Y | W | Y | D | G | F | T | T | G | E | H | K | .. |
| QWY16079.1 | .. | EVVVPOLLOQ | M     | V     | P     | G         | A     | K         | P         | D     | S | R | E | S | L | A | W | T | A | T | N | S | V | F | V | K | L | S | D | P | A | Q | V | S | F | F | M | S | P | A | S | A   | Y | W | Y | D | G | F | T | T | G | E | H | K | .. |
| QWY16078.1 | .. | EVVVPOLLOQ | M     | V     | P     | G         | A     | K         | P         | D     | S | R | E | S | L | A | W | T | A | T | N | S | V | F | V | K | L | S | D | P | A | Q | V | S | F | F | M | S | P | A | S | A   | Y | W | Y | D | G | F | T | T | G | E | H | K | .. |
| QWY16075.1 | .. | EVVVPOLLOQ | M     | V     | P     | G         | A     | K         | P         | D     | S | R | E | S | L | A | W | T | A | T | N | S | V | F | V | K | L | S | D | P | A | Q | V | S | F | F | M | S | P | A | S | A   | Y | W | Y | D | G | F | T | T | G | E | H | K | .. |
| QWY16074.1 | .. | EVVVPOLLOQ | M     | V     | P     | G         | A     | K         | P         | D     | S | R | E | S | L | A | W | T | A | T | N | S | V | F | V | K | L | S | D | P | A | Q | V | S | F | F | M | S | P | A | S | A   | Y | W | Y | D | G | F | T | T | G | E | H | K | .. |
| QWY16073.1 | .. | EVVVPOLLOQ | M     | V     | P     | G         | A     | K         | P         | D     | S | R | E | S | L | A | W | T | A | T | N | S | V | F | V | K | L | S | D | P | A | Q | V | S | F | F | M | S | P | A | S | A   | Y | W | Y | D | G | F | T | T | G | E | H | K | .. |
| QWY16147.1 | .. | EVVVPOLLOQ | M     | V     | P     | G         | A     | K         | P         | D     | S | R | E | S | L | A | W | T | A | T | N | S | V | F | V | K | L | S | D | P | A | Q | V | S | F | F | M | S | P | A | S | A   | Y | W | Y | D | G | F | T | T | G | E | H | K | .. |
| QWY16146.1 | .. | EVVVPOLLOQ | M     | V     | P     | G         | A     | K         | P         | D     | S | R | E | S | L | A | W | T | A | T | N | S | V | F | V | K | L | S | D | P | A | Q | V | S | F | F | M | S | P | A | S | A   | Y | W | Y | D | G | F | T | T | G | E | H | K | .. |
| QOP74909.1 | .. | EVVVPOLLOQ | M     | V     | P     | G         | A     | K         | P         | D     | S | R | E | S | L | A | W | T | A | T | N | S | V | F | V | K | L | S | D | P | A | Q | V | S | F | F | M | S | P | A | S | A   | Y | W | Y | D | G | F | T | T | G | E | H | K | .. |
| QUS47948.1 | .. | EVVVPOLLOQ | M     | V     | P     | G         | A     | K         | P         | D     | S | R | E | S | L | A | W | T | A | T | N | S | V | F | V | K | L | S | D | P | A | Q | V | S | F | F | M | S | P | A | S | A   | Y | W | Y | D | G | F | T | T | G | E | H | K | .. |
| QUS47947.1 | .. | EVVVPOLLOQ | M     | V     | P     | G         | A     | K         | P         | D     | S | R | E | S | L | A | W | T | A | T | N | S | V | F | V | K | L | S | D | P | A | Q | V | S | F | F | M | S | P | A | S | A   | Y | W | Y | D | G | F | T | T | G | E | H | K | .. |
| QUS47944.1 | .. | EVVVPOLLOQ | M     | V     | P     | G         | A     | K         | P         | D     | S | R | E | S | L | A | W | T | A | T | N | S | V | F | V | K | L | S | D | P | A | Q | V | S | F | F | M | S | P | A | S | A   | Y | W | Y | D | G | F | T | T | G | E | H | K | .. |
| QUS47942.1 | .. | EVVVPOLLOQ | M     | V     | P     | G         | A     | K         | P         | D     | S | R | E | S | L | A | W | T | A | T | N | S | V | F | V | K | L | S | D | P | A | Q | V | S | F | F | M | S | P | A | S | A   | Y | W | Y | D | G | F | T | T | G | E | H | K | .. |
| QUS47941.1 | .. | EVVVPOLLOQ | M     | V     | P     | G         | A     | K         | P         | D     | S | R | E | S | L | A | W | T | A | T | N | S | V | F | V | K | L | S | D | P | A | Q | V | S | F | F | M | S | P | A | S | A   | Y | W | Y | D | G | F | T | T | G | E | H | K | .. |
| QUS47940.1 | .. | EVVVPOLLOQ | M     | V     | P     | G         | A     | K         | P         | D     | S | R | E | S | L | A | W | T | A | T | N | S | V | F | V | K | L | S | D | P | A | Q | V | S | F | F | M | S | P | A | S | A   | Y | W | Y | D | G | F | T | T | G | E | H | K | .. |
| QUS47928.1 | .. | EVVVPOLLOQ | M     | V     | P     | G         | A     | K         | P         | D     | S | R | E | S | L | A | W | T | A | T | N | S | V | F | V | K | L | S | D | P | A | Q | V | S | F | F | M | S | P | A | S | A   | Y | W | Y | D | G | F | T | T | G | E | H | K | .. |
| QUS47926.1 | .. | EVVVPOLLOQ | M     | V     | P     | G         | A     | K         | P         | D     | S | R | E | S | L | A | W | T | A | T | N | S | V | F | V | K | L | S | D | P | A | Q | V | S | F | F | M | S | P | A | S | A   | Y | W | Y | D | G | F | T | T | G | E | H | K | .. |
| QUS47921.1 | .. | EVVVPOLLOQ | M     | V     | P     | G         | A     | K         | P         | D     | S | R | E | S | L | A | W | T | A | T | N | S | V | F | V | K | L | S | D | P | A | Q | V | S | F | F | M | S | P | A | S | A   | Y | W | Y | D | G | F | T | T | G | E | H | K | .. |
| QUS47920.1 | .. | EVVVPOLLOQ | M     | V     | P     | G         | A     | K         | P         | D     | S | R | E | S | L | A | W | T | A | T | N | S | V | F | V | K | L | S | D | P | A | Q | V | S | F | F | M | S | P | A | S | A   | Y | W | Y | D | G | F | T | T | G | E | H | K | .. |
| QNN25845.1 | .. | EVVVPOLLOQ | M     | V     | P     | G         | A     | K         | P         | D     | S | R | E | S | L | A | W | T | A | T | N | S | V | F | V | K | L | S | D | P | A | Q | V | S | F | F | M | S | P | A | S | A   | Y | W | Y | D | G | F | T | T | G | E | H | K | .. |
| QWY16162.1 | .. | EVVVPOLLOQ | M     | V     | P     | G         | A     | K         | P         | D     | S | R | E | S | L | A | W | T | A | T | N | S | V | F | V | K | L | S | D | P | A | Q | V | S | F | F | M | S | P | A | S | A   | Y | W | Y | D | G | F | T | T | G | E | H | K | .. |
| QWY16161.1 | .. | EVVVPOLLOQ | M     | V     | P     | G         | A     | K         | P         | D     | S | R | E | S | L | A | W | T | A | T | N | S | V | F | V | K | L | S | D | P | A | Q | V | S | F | F | M | S | P | A | S | A   | Y | W | Y | D | G | F | T | T | G | E | H | K | .. |
| QWY16159.1 | .. | EVVVPOLLOQ | M     | V     | P     | G         | A     | K         | P         | D     | S | R | E | S | L | A | W | T | A | T | N | S | V | F | V | K | L | S | D | P | A | Q | V | S | F | F | M | S | P | A | S | A</ |   |   |   |   |   |   |   |   |   |   |   |   |    |

[illegible]



[illegible]

[illegible]

[illegible]



[illegible]

[illegible]

|            |    |            |      |        |            |    |    |                |    |          |    |         |    |          |    |      |
|------------|----|------------|------|--------|------------|----|----|----------------|----|----------|----|---------|----|----------|----|------|
| QWY15824.1 | .. | ELVPOLQIQY | MVVP | GAPKPT | SRDSFWAQAT | .. | NB | SFVKMTDTPPAQVS | VF | FMSPASAA | .. | QWY4961 | .. | PTTFGEHL | .. | QAND |
| QWY15823.1 | .. | ELVPOLQIQY | MVVP | GAPKPT | SRDSFWAQAT | .. | NB | SFVKMTDTPPAQVS | VF | FMSPASAA | .. | QWY4962 | .. | PTTFGEHL | .. | QAND |
| QWY15822.1 | .. | ELVPOLQIQY | MVVP | GAPKPT | SRDSFWAQAT | .. | NB | SFVKMTDTPPAQVS | VF | FMSPASAA | .. | QWY4963 | .. | PTTFGEHL | .. | QAND |
| QWY15821.1 | .. | ELVPOLQIQY | MVVP | GAPKPT | SRDSFWAQAT | .. | NB | SFVKMTDTPPAQVS | VF | FMSPASAA | .. | QWY4964 | .. | PTTFGEHL | .. | QAND |
| QWY15778.1 | .. | ELVPOLQIQY | MVVP | GAPKPT | SRDSFWAQAT | .. | NB | SFVKMTDTPPAQVS | VF | FMSPASAA | .. | QWY4965 | .. | PTTFGEHL | .. | QAND |
| QWY15801.1 | .. | ELVPOLQIQY | MVVP | GAPKPT | SRDSFWAQAT | .. | NB | SFVKMTDTPPAQVS | VF | FMSPASAA | .. | QWY4966 | .. | PTTFGEHL | .. | QAND |
| QWY15791.1 | .. | ELVPOLQIQY | MVVP | GAPKPT | SRDSFWAQAT | .. | NB | SFVKMTDTPPAQVS | VF | FMSPASAA | .. | QWY4967 | .. | PTTFGEHL | .. | QAND |
| QWY15775.1 | .. | ELVPOLQIQY | MVVP | GAPKPT | SRDSFWAQAT | .. | NB | SFVKMTDTPPAQVS | VF | FMSPASAA | .. | QWY4968 | .. | PTTFGEHL | .. | QAND |
| QWY15774.1 | .. | ELVPOLQIQY | MVVP | GAPKPT | SRDSFWAQAT | .. | NB | SFVKMTDTPPAQVS | VF | FMSPASAA | .. | QWY4969 | .. | PTTFGEHL | .. | QAND |
| QWY15773.1 | .. | ELVPOLQIQY | MVVP | GAPKPT | SRDSFWAQAT | .. | NB | SFVKMTDTPPAQVS | VF | FMSPASAA | .. | QWY4970 | .. | PTTFGEHL | .. | QAND |
| QYCS5183.1 | .. | ELVPOLQIQY | MVVP | GAPKPT | SRDSFWAQAT | .. | NB | SFVKMTDTPPAQVS | VF | FMSPASAA | .. | QWY4971 | .. | PTTFGEHL | .. | QAND |
| BCR43094.1 | .. | ELVPOLQIQY | MVVP | GAPKPT | SRDSFWAQAT | .. | NB | SFVKMTDTPPAQVS | VF | FMSPASAA | .. | QWY4972 | .. | PTTFGEHL | .. | QAND |
| BCR43081.1 | .. | ELVPOLQIQY | MVVP | GAPKPT | SRDSFWAQAT | .. | NB | SFVKMTDTPPAQVS | VF | FMSPASAA | .. | QWY4973 | .. | PTTFGEHL | .. | QAND |
| BCG67017.1 | .. | ELVPOLQIQY | MVVP | GAPKPT | SRDSFWAQAT | .. | NB | SFVKMTDTPPAQVS | VF | FMSPASAA | .. | QWY4974 | .. | PTTFGEHL | .. | QAND |
| BCG67015.1 | .. | ELVPOLQIQY | MVVP | GAPKPT | SRDSFWAQAT | .. | NB | SFVKMTDTPPAQVS | VF | FMSPASAA | .. | QWY4975 | .. | PTTFGEHL | .. | QAND |
| BCG67014.1 | .. | ELVPOLQIQY | MVVP | GAPKPT | SRDSFWAQAT | .. | NB | SFVKMTDTPPAQVS | VF | FMSPASAA | .. | QWY4976 | .. | PTTFGEHL | .. | QAND |
| BCG67010.1 | .. | ELVPOLQIQY | MVVP | GAPKPT | SRDSFWAQAT | .. | NB | SFVKMTDTPPAQVS | VF | FMSPASAA | .. | QWY4977 | .. | PTTFGEHL | .. | QAND |
| QYCS5184.1 | .. | ELVPOLQIQY | MVVP | GAPKPT | SRDSFWAQAT | .. | NB | SFVKMTDTPPAQVS | VF | FMSPASAA | .. | QWY4978 | .. | PTTFGEHL | .. | QAND |
| QWF08853.1 | .. | ELVPOLQIQY | MVVP | GAPKPT | SRDSFWAQAT | .. | NB | SFVKMTDTPPAQVS | VF | FMSPASAA | .. | QWY4979 | .. | PTTFGEHL | .. | QAND |
| QYCS6140.1 | .. | ELVPOLQIQY | MVVP | GAPKPT | SRDSFWAQAT | .. | NB | SFVKMTDTPPAQVS | VF | FMSPASAA | .. | QWY4980 | .. | PTTFGEHL | .. | QAND |
| QYCS5133.1 | .. | ELVPOLQIQY | MVVP | GAPKPT | SRDSFWAQAT | .. | NB | SFVKMTDTPPAQVS | VF | FMSPASAA | .. | QWY4981 | .. | PTTFGEHL | .. | QAND |
| QYCS5132.1 | .. | ELVPOLQIQY | MVVP | GAPKPT | SRDSFWAQAT | .. | NB | SFVKMTDTPPAQVS | VF | FMSPASAA | .. | QWY4982 | .. | PTTFGEHL | .. | QAND |
| QYCS6108.1 | .. | ELVPOLQIQY | MVVP | GAPKPT | SRDSFWAQAT | .. | NB | SFVKMTDTPPAQVS | VF | FMSPASAA | .. | QWY4983 | .. | PTTFGEHL | .. | QAND |
| QYCS5098.1 | .. | ELVPOLQIQY | MVVP | GAPKPT | SRDSFWAQAT | .. | NB | SFVKMTDTPPAQVS | VF | FMSPASAA | .. | QWY4984 | .. | PTTFGEHL | .. | QAND |
| QYCS6097.1 | .. | ELVPOLQIQY | MVVP | GAPKPT | SRDSFWAQAT | .. | NB | SFVKMTDTPPAQVS | VF | FMSPASAA | .. | QWY4985 | .. | PTTFGEHL | .. | QAND |
| QYCS6094.1 | .. | ELVPOLQIQY | MVVP | GAPKPT | SRDSFWAQAT | .. | NB | SFVKMTDTPPAQVS | VF | FMSPASAA | .. | QWY4986 | .. | PTTFGEHL | .. | QAND |
| QYCS6091.1 | .. | ELVPOLQIQY | MVVP | GAPKPT | SRDSFWAQAT | .. | NB | SFVKMTDTPPAQVS | VF | FMSPASAA | .. | QWY4987 | .. | PTTFGEHL | .. | QAND |
| QW088850.1 | .. | ELVPOLQIQY | MVVP | GAPKPT | SRDSFWAQAT | .. | NB | SFVKMTDTPPAQVS | VF | FMSPASAA | .. | QWY4988 | .. | PTTFGEHL | .. | QAND |
| QYCS6056.1 | .. |            |      |        |            |    |    |                |    |          |    |         |    |          |    |      |



[illegible]

[illegible]

[illegible]



QWY16174.1 ...NTSPIPVQIMYVPPGAPVETGRDTFQWQTAI~~NP~~SPVISKMTDPPAQVSV~~PF~~MSPASTYQW~~FD~~GYPTFGEVP...VTTN  
QWY16171.1 ...NTSPIPVQIMYVPPGAPVETGRDTFQWQTAI~~NP~~SPVISKMTDPPAQVSV~~PF~~MSPASTYQW~~FD~~GYPTFGEVP...ATTN  
QWY16173.1 ...NTSPIPVQIMYVPPGAPVETGRDTFQWQTAI~~NP~~SPVISKMTDPPAQVSV~~PF~~MSPASTYQW~~FD~~GYPTFGEVP...VTTN  
QWY16172.1 ...NTSPIPVQIMYVPPGAPVETGRDTFQWQTAI~~NP~~SPVISKMTDPPAQVSV~~PF~~MSPASTYQW~~FD~~GYPTFGEVP...ATTN  
QWY16170.1 ...NTSPIPVQIMYVPPGAPVETGRDTFQWQTAI~~NP~~SPVISKMTDPPAQVSV~~PF~~MSPASTYQW~~FD~~GYPTFGEVP...VTTN  
QWY16169.1 ...NTSPIPVQIMYVPPGAPVETGRDTFQWQTAI~~NP~~SPVISKMTDPPAQVSV~~PF~~MSPASTYQW~~FD~~GYPTFGEVP...VTTN  
QWY16168.1 ...NTSPIPVQIMYVPPGAPVETGRDTFQWQTAI~~NP~~SPVISKMTDPPAQVSV~~PF~~MSPASTYQW~~FD~~GYPTFGEVP...VTTN  
QXF31588.1 ...KTSPIMLQIMYVPPGAPVETGRDTFQWQSAI~~NP~~SVILVKMTDPPAQVAI~~PF~~MSPASAYQW~~FD~~GYPTFGERP...VTTN  
QXF31587.1 ...KTSPIMLQIMYVPPGAPVETGRDTFQWQSAI~~NP~~SVILVKMTDPPAQVAI~~PF~~MSPASAYQW~~FD~~GYPTFGERP...VTTN  
pdb|6110|A ...EAPRYMLQIMYVPPGAPVETGRDAFQWQTAI~~NP~~SVFVKLTDPAPQVSV~~PF~~MSPASAYQW~~FD~~GYPTFGQHP...ETSN  
pdb|611J|A ...EAPRYMLQIMYVPPGAPVETGRDAFQWQTAI~~NP~~SVFVKLTDPAPQVSV~~PF~~MSPASAYQW~~FD~~GYPTFGQHP...ETSN  
pdb|6AKS|A ...EAPRYMLQIMYVPPGAPVETGRDAFQWQTAI~~NP~~SVFVKLTDPAPQVSV~~PF~~MSPASAYQW~~FD~~GYPTFGQHP...ETSN  
BCD33944.1 ...AVSPVQLQIMYVPPGSVAENDDSYQWQSAAN~~PS~~IFFNSNGVPA~~RF~~ST~~PF~~VGTANAYIMYDGYNQFGG~~NR~~...PTS.  
pdb|7ECY|A TYVGLPDLTLQAMFVETGALIEKQDSFHWQSGSNASVFFFKISDPPARIT~~PF~~MCINSAYSVF~~YD~~GFAGFEKN...  
pdb|7EC5|A TYVGLPDLTLQAMFVETGALIEKQDSFHWQSGSNASVFFFKISDPPARIT~~PF~~MCINSAYSVF~~YD~~GFAGFEKN...  
pdb|7EBZ|A TYVGLPDLTLQAMFVETGALIEKQDSFHWQSGSNASVFFFKISDPPARIT~~PF~~MCINSAYSVF~~YD~~GFAGFEKN...  
pdb|7EBR|A TYVGLPDLTLQAMFVETGALIEKQDSFHWQSGSNASVFFFKISDPPARIT~~PF~~MCINSAYSVF~~YD~~GFAGFEKN...  
pdb|6MZI|A TYVGLPDLTLQAMFVETGALIEKQDSFHWQSGSNASVFFFKISDPPARIT~~PF~~MCINSAYSVF~~YD~~GFAGFEKN...  
pdb|6CSH|A TYVGLPDLTLQAMFVETGALIEKQDSFHWQSGSNASVFFFKISDPPARIT~~PF~~MCINSAYSVF~~YD~~GFAGFEKN...  
pdb|6CSG|A TYVGLPDLTLQAMFVETGALIEKQDSFHWQSGSNASVFFFKISDPPARIT~~PF~~MCINSAYSVF~~YD~~GFAGFEKN...  
pdb|6CSA|A TYVGLPDLTLQAMFVETGALIEKQDSFHWQSGSNASVFFFKISDPPARIT~~PF~~MCINSAYSVF~~YD~~GFAGFEKN...  
pdb|6CS6|A TYVGLPDLTLQAMFVETGALIEKQDSFHWQSGSNASVFFFKISDPPARIT~~PF~~MCINSAYSVF~~YD~~GFAGFEKN...  
pdb|6CS5|A TYVGLPDLTLQAMFVETGALIEKQDSFHWQSGSNASVFFFKISDPPARIT~~PF~~MCINSAYSVF~~YD~~GFAGFEKN...  
pdb|6CS4|A TYVGLPDLTLQAMFVETGALIEKQDSFHWQSGSNASVFFFKISDPPARIT~~PF~~MCINSAYSVF~~YD~~GFAGFEKN...  
pdb|6CS3|A TYVGLPDLTLQAMFVETGALIEKQDSFHWQSGSNASVFFFKISDPPARIT~~PF~~MCINSAYSVF~~YD~~GFAGFEKN...  
pdb|6CRU|A TYVGLPDLTLQAMFVETGALIEKQDSFHWQSGSNASVFFFKISDPPARIT~~PF~~MCINSAYSVF~~YD~~GFAGFEKN...  
pdb|6CRS|A TYVGLPDLTLQAMFVETGALIEKQDSFHWQSGSNASVFFFKISDPPARIT~~PF~~MCINSAYSVF~~YD~~GFAGFEKN...  
pdb|6CRR|A TYVGLPDLTLQAMFVETGALIEKQDSFHWQSGSNASVFFFKISDPPARIT~~PF~~MCINSAYSVF~~YD~~GFAGFEKN...  
pdb|6CRP|A TYVGLPDLTLQAMFVETGALIEKQDSFHWQSGSNASVFFFKISDPPARIT~~PF~~MCINSAYSVF~~YD~~GFAGFEKN...  
QNO39042.1 TYVGLPDLTLQAMFVETGALIEKQDSFHWQSGSNASVFFFKISDPPARMT~~PF~~MCINSAYSVF~~YD~~GFAGFEKT...  
QNO39041.1 TYVGLPDLTLQAMFVETGALIEKQDSFHWQSGSNASVFFFKISDPPARMT~~PF~~MCINSAYSVF~~YD~~GFAGFEKT...  
QNO39040.1 TYVGLPDLTLQAMFVETGALIEKQDSFHWQSGSNASVFFFKISDPPARMT~~PF~~MCINSAYSVF~~YD~~GFAGFEKT...  
QNO39038.1 TYVGLPDLTLQAMFVETGALIEKQDSFHWQSGSNASVFFFKISDPPARMT~~PF~~MCINSAYSVF~~YD~~GFAGFEKT...  
QNO39039.1 TYVGLPDLTLQAMFVETGALIEKQDSFHWQSGSNASVFFFKISDPPARMT~~PF~~MCINSAYSVF~~YD~~GFAGFEKT...  
CAA1539354.1 TYVGLPDLTLQAMFVETGALIEKQDSFHWQSGSNASVFFFKISDPPARMT~~PF~~MCINSAYSVF~~YD~~GFAGFEKT...  
CAA1527138.1 TYVGLPDLTLQAMFVETGALIEKQDSFHWQSGSNASVFFFKISDPPARMT~~PF~~MCINSAYSVF~~YD~~GFAGFEKT...  
CAA1539353.1 TYVGLPDLTLQAMFVETGALIEKQDSFHWQSGSNASVFFFKISDPPARMT~~PF~~MCINSAYSVF~~YD~~GFAGFEKT...  
CAA1527136.1 TYVGLPDLTLQAMFVETGALIEKQDSFHWQSGSNASVFFFKISDPPARMT~~PF~~MCINSAYSVF~~YD~~GFAGFEKT...  
QNO39037.1 TYVGLPDLTLQAMFVETGALIEKQDSFHWQSGSNASVFFFKISDPPARMT~~PF~~MCINSAYSVF~~YD~~GFAGFEKT...  
QKX95883.1 TYVGLPDLTLQAMFVETGALIEKQDSFHWQSGSNASVFFFKISDPPARMT~~PF~~MCINSAYSVF~~YD~~GFAGFEKT...  
pdb|5BNP|A TYMGLPDLTLQAMFVETGALIEKQDSFHWQSGSNASVFFFKISDPPARMT~~PF~~MCINSAYSVF~~YD~~GFAGFEKN...  
pdb|5BNO|A TYMGLPDLTLQAMFVETGALIEKQDSFHWQSGSNASVFFFKISDPPARMT~~PF~~MCINSAYSVF~~YD~~GFAGFEKN...  
pdb|5BNN|A TYMGLPDLTLQAMFVETGALIEKQDSFHWQSGSNASVFFFKISDPPARMT~~PF~~MCINSAYSVF~~YD~~GFAGFEKN...  
pdb|4WM8|A TYMGLPDLTLQAMFVETGALIEKQDSFHWQSGSNASVFFFKISDPPARMT~~PF~~MCINSAYSVF~~YD~~GFAGFEKN...  
pdb|4WM7|A TYMGLPDLTLQAMFVETGALIEKQDSFHWQSGSNASVFFFKISDPPARMT~~PF~~MCINSAYSVF~~YD~~GFAGFEKN...  
QIC50353.1 AAR...DYVYQIMYVPPGAPVETOSWDDYTWQSS~~NP~~SIIFYTTGNAN~~PR~~IS~~PF~~VGIAAAYSH~~FD~~GSIVFF~~PN~~VDAGAS  
QIC50352.1 AAR...DYVYQIMYVPPGAPVETOSWDDYTWQSS~~NP~~SIIFYTTGNAN~~PR~~IS~~PF~~VGIAAAYSH~~FD~~GSIVFF~~PN~~VDAGAS  
QIC50356.1 AAR...NYIYQIMYVPPGAPVETQAWDDYTWQSS~~NP~~SVFYTTGNAS~~PR~~MS~~IF~~VIGIAAAYSH~~FD~~GSIVFF~~PN~~IDAGAT

[illegible]

|            |     |         |   |     |   |    |   |   |   |   |   |   |   |   |   |   |   |   |   |   |   |   |   |   |   |   |   |   |   |   |   |   |   |   |   |   |   |   |   |   |   |   |   |   |   |   |   |   |   |   |   |   |   |   |   |   |   |
|------------|-----|---------|---|-----|---|----|---|---|---|---|---|---|---|---|---|---|---|---|---|---|---|---|---|---|---|---|---|---|---|---|---|---|---|---|---|---|---|---|---|---|---|---|---|---|---|---|---|---|---|---|---|---|---|---|---|---|---|
| QWY16036.1 | LEY | GACPNMM | G | TFS | U | VG | T | S | K | S | K | P | L | V | V | R | I | Y | M | R | K | V | R | A | W | P | P | M | R | N | O | N | Y | L | F | K | A | N | P | N | Y | A | G | N | T | I | K | P | G | A | S | T | A | I | T | T | L |
| QWY16120.1 | LEY | GACPNMM | G | TFS | U | VG | T | S | K | S | K | P | L | V | V | R | I | Y | M | R | K | V | R | A | W | P | P | M | R | N | O | N | Y | L | F | K | A | N | P | N | Y | A | G | N | T | I | K | P | G | A | S | T | A | I | T | T | L |
| QWY16119.1 | LEY | GACPNMM | G | TFS | U | VG | T | S | K | S | K | P | L | V | V | R | I | Y | M | R | K | V | R | A | W | P | P | M | R | N | O | N | Y | L | F | K | A | N | P | N | Y | A | G | N | T | I | K | P | G | A | S | T | A | I | T | T | L |
| QWY16102.1 | LEY | GACPNMM | G | TFS | U | VG | T | S | K | S | K | P | L | V | V | R | I | Y | M | R | K | V | R | A | W | P | P | M | R | N | O | N | Y | L | F | K | A | N | P | N | Y | A | G | N | T | I | K | P | G | A | S | T | A | I | T | T | L |
| QWY16100.1 | LEY | GACPNMM | G | TFS | U | VG | T | S | K | S | K | P | L | V | V | R | I | Y | M | R | K | V | R | A | W | P | P | M | R | N | O | N | Y | L | F | K | A | N | P | N | Y | A | G | N | T | I | K | P | G | A | S | T | A | I | T | T | L |
| QWY16097.1 | LEY | GACPNMM | G | TFS | U | VG | T | S | K | S | K | P | L | V | V | R | I | Y | M | R | K | V | R | A | W | P | P | M | R | N | O | N | Y | L | F | K | A | N | P | N | Y | A | G | N | T | I | K | P | G | A | S | T | A | I | T | T | L |
| QWY16096.1 | LEY | GACPNMM | G | TFS | U | VG | T | S | K | S | K | P | L | V | V | R | I | Y | M | R | K | V | R | A | W | P | P | M | R | N | O | N | Y | L | F | K | A | N | P | N | Y | A | G | N | T | I | K | P | G | A | S | T | A | I | T | T | L |
| BBU37472.1 | LEY | GACPNMM | G | TFS | U | VG | T | S | K | S | K | P | L | V | V | R | I | Y | M | R | K | V | R | A | W | P | P | M | R | N | O | N | Y | L | F | K | A | N | P | N | Y | A | G | N | T | I | K | P | G | A | S | T | A | I | T | T | L |
| QWY16108.1 | LEY | GACPNMM | G | TFS | U | VG | T | S | K | S | K | P | L | V | V | R | I | Y | M | R | K | V | R | A | W | P | P | M | R | N | O | N | Y | L | F | K | A | N | P | N | Y | A | G | N | T | I | K | P | G | A | S | T | A | I | T | T | L |
| QWY16042.1 | LEY | GACPNMM | G | TFS | U | VG | T | S | K | S | K | P | L | V | V | R | I | Y | M | R | K | V | R | A | W | P | P | M | R | N | O | N | Y | L | F | K | A | N | P | N | Y | A | G | N | T | I | K | P | G | A | S | T | A | I | T | T | L |
| QOP74910.1 | LEY | GACPNMM | G | TFS | U | VG | T | S | K | S | K | P | L | V | V | R | I | Y | M | R | K | V | R | A | W | P | P | M | R | N | O | N | Y | L | F | K | A | N | P | N | Y | A | G | N | T | I | K | P | G | A | S | T | A | I | T | T | L |
| QWY16128.1 | LEY | GACPNMM | G | TFS | U | VG | T | S | K | S | K | P | L | V | V | R | I | Y | M | R | K | V | R | A | W | P | P | M | R | N | O | N | Y | L | F | K | A | N | P | N | Y | A | G | N | T | I | K | P | G | A | S | T | A | I | T | T | L |
| QWY16127.1 | LEY | GACPNMM | G | TFS | U | VG | T | S | K | S | K | P | L | V | V | R | I | Y | M | R | K | V | R | A | W | P | P | M | R | N | O | N | Y | L | F | K | A | N | P | N | Y | A | G | N | T | I | K | P | G | A | S | T | A | I | T | T | L |



[illegible]

|           |     |   |   |   |   |   |   |   |   |   |   |   |   |   |   |   |   |   |   |   |   |   |   |   |   |   |   |   |   |   |   |   |   |   |   |   |   |   |   |   |   |   |   |   |   |   |   |   |   |   |   |   |   |   |   |   |   |
|-----------|-----|---|---|---|---|---|---|---|---|---|---|---|---|---|---|---|---|---|---|---|---|---|---|---|---|---|---|---|---|---|---|---|---|---|---|---|---|---|---|---|---|---|---|---|---|---|---|---|---|---|---|---|---|---|---|---|---|
| QW08740.1 | LDY | G | C | G | C | C | N | N | M | G | T | F | S | I | T | L | R | V | M | K | I | K | V | R | A | W | P | R | L | R | N | O | P | Y | L | F | K | T | N | P | N | Y | K | G | N | D | I | C | T | S | R | D | K | I | T | T | L |
| QW08741.1 | LDY | G | C | G | C | C | N | N | M | G | T | F | S | I | T | L | R | V | M | K | I | K | V | R | A | W | P | R | L | R | N | O | P | Y | L | F | K | T | N | P | N | Y | K | G | N | D | I | C | T | S | R | D | K | I | T | T | L |
| QW08746.1 | LDY | G | C | G | C | C | N | N | M | G | T | F | S | I | T | L | R | V | M | K | I | K | V | R | A | W | P | R | L | R | N | O | P | Y | L | F | K | T | N | P | N | Y | K | G | N | D | I | C | T | S | R | D | K | I | T | T | L |
| QW08759.1 | LDY | G | C | G | C | C | N | N | M | G | T | F | S | I | T | L | R | V | M | K | I | K | V | R | A | W | P | R | L | R | N | O | P | Y | L | F | K | T | N | P | N | Y | K | G | N | D | I | C | T | S | R | D | K | I | T | T | L |
| QW08762.1 | LDY | G | C | G | C | C | N | N | M | G | T | F | S | I | T | L | R | V | M | K | I | K | V | R | A | W | P | R | L | R | N | O | P | Y | L | F | K | T | N | P | N | Y | K | G | N | D | I | C | T | S | R | D | K | I | T | T | L |
| QW08761.1 | LDY | G | C | G | C | C | N | N | M | G | T | F | S | I | T | L | R | V | M | K | I | K | V | R | A | W | P | R | L | R | N | O | P | Y | L | F | K | T | N | P | N | Y | K | G | N | D | I | C | T | S | R | D | K | I | T | T | L |
| QW08763.1 | LDY | G | C | G | C | C | N | N | M | G | T | F | S | I | T | L | R | V | M | K | I | K | V | R | A | W | P | R | L | R | N | O | P | Y | L | F | K | T | N | P | N | Y | K | G | N | D | I | C | T | S | R | D | K | I | T | T | L |
| QW08773.1 | LDY | G | C | G | C | C | N | N | M | G | T | F | S | I | T | L | R | V | M | K | I | K | V | R | A | W | P | R | L | R | N | O | P | Y | L | F | K | T | N | P | N | Y | K | G | N | D | I | C | T | S | R | D | K | I | T | T | L |
| QW08749.1 | LDY | G | C | G | C | C | N | N | M | G | T | F | S | I | T | L | R | V | M | K | I | K | V | R | A | W | P | R | L | R | N | O | P | Y | L | F | K | T | N | P | N | Y | K | G | N | D | I | C | T | S | R | D | K | I | T | T | L |
| QW08785.1 | LDY | G | C | G | C | C | N | N | M | G | T | F | S | I | T | L | R | V | M | K | I | K | V | R | A | W | P | R | L | R | N | O | P | Y | L | F | K | T | N | P | N | Y | K | G | N | D | I | C | T | S | R | D | K | I | T | T | L |
| QW08783.1 | LDY | G | C | G | C | C | N | N | M | G | T | F | S | I | T | L | R | V | M | K | I | K | V | R | A | W | P | R | L | R | N | O | P | Y | L | F | K | T | N | P | N | Y | K | G | N | D | I | C | T | S | R | D | K | I | T | T | L |
| QW08765.1 | LDY | G | C | G | C | C | N | N | M | G | T | F | S | I | T | L | R | V | M | K | I | K | V | R | A | W | P | R | L | R | N | O | P | Y | L | F | K | T | N | P | N | Y | K | G | N | D | I | C | T | S | R | D | K | I | T | T | L |
| QW08792.1 | LDY | G | C | G | C | C | N | N | M | G | T | F | S | I | T | L | R | V | M | K | I | K | V | R | A | W | P | R | L | R | N | O | P | Y | L | F | K | T | N | P | N | Y | K | G | N | D | I | C | T | S | R | D | K | I | T | T | L |
| QW08767.1 | LDY | G | C | G | C | C | N | N | M | G | T | F | S | I | T |   |   |   |   |   |   |   |   |   |   |   |   |   |   |   |   |   |   |   |   |   |   |   |   |   |   |   |   |   |   |   |   |   |   |   |   |   |   |   |   |   |   |

[illegible]



[illegible]

|            |     |    |        |      |    |    |    |    |                |       |    |    |    |    |    |    |    |    |    |    |    |    |    |     |    |
|------------|-----|----|--------|------|----|----|----|----|----------------|-------|----|----|----|----|----|----|----|----|----|----|----|----|----|-----|----|
| QW08949.1  | LDY | GC | CCNNMM | GTFS | RV | TG | VT | GT | SPHSITLRVMYRAI | KVRAW | PR | LR | NP | YF | LK | NP | NY | KG | ND | IK | TS | TS | RD | KIT | TL |
| QW08948.2  | LDY | GC | CCNNMM | GTFS | RV | TG | VT | GT | SPHSITLRVMYRAI | KVRAW | PR | LR | NP | YF | LK | NP | NY | KG | ND | IK | TS | TS | RD | KIT | TL |
| QW15921.1  | LDY | GC | CCNNMM | GTFS | RV | TG | VT | GT | SPHSITLRVMYRAI | KVRAW | PR | LR | NP | YF | LK | NP | NY | KG | ND | IK | TS | TS | RD | KIT | TL |
| QW15919.1  | LDY | GC | CCNNMM | GTFS | RV | TG | VT | GT | SPHSITLRVMYRAI | KVRAW | PR | LR | NP | YF | LK | NP | NY | KG | ND | IK | TS | TS | RD | KIT | TL |
| QCE50102.1 | LDY | GC | CCNNMM | GTFS | RV | TG | VT | GT | SPHSITLRVMYRAI | KVRAW | PR | LR | NP | YF | LK | NP | NY | KG | ND | IK | TS | TS | RD | KIT | TL |
| BCI43082.1 | LDY | GC | CCNNMM | GTFS | RV | TG | VT | GT | SPHSITLRVMYRAI | KVRAW | PR | LR | NP | YF | LK | NP | NY | KG | ND | IK | TS | TS | RD | KIT | TL |
| QW08947.1  | LDY | GC | CCNNMM | GTFS | RV | TG | VT | GT | SPHSITLRVMYRAI | KVRAW | PR | LR | NP | YF | LK | NP | NY | KG | ND | IK | TS | TS | RD | KIT | TL |
| BC165329.1 | LDY | GC | CCNNMM | GTFS | RV | TG | VT | GT | SPHSITLRVMYRAI | KVRAW | PR | LR | NP | YF | LK | NP | NY | KG | ND | IK | TS | TS | RD | KIT | TL |
| QW08887.1  | LDY | GC | CCNNMM | GTFS | RV | TG | VT | GT | SPHSITLRVMYRAI | KVRAW | PR | LR | NP | YF | LK | NP | NY | KG | ND | IK | TS | TS | RD | KIT | TL |
| QCE5036.1  | LDY | GC | CCNNMM | GTFS | RV | TG | VT | GT | SPHSITLRVMYRAI | KVRAW | PR | LR | NP | YF | LK | NP | NY | KG | ND | IK | TS | TS | RD | KIT | TL |
| QT473913.1 | LDY | GC | CCNNMM | GTFS | RV | TG | VT | GT | SPHSITLRVMYRAI | KVRAW | PR | LR | NP | YF | LK | NP | NY | KG | ND | IK | TS | TS | RD | KIT | TL |
| QW15837.1  | LDY | GC | CCNNMM | GTFS | RV | TG | VT | GT | SPHSITLRVMYRAI | KVRAW | PR | LR | NP | YF | LK | NP | NY | KG | ND | IK | TS | TS | RD | KIT | TL |
| QW15836.1  | LDY | GC | CCNNMM | GTFS | RV | TG | VT | GT | SPHSITLRVMYRAI | KVRAW | PR | LR | NP | YF | LK | NP | NY | KG | ND | IK | TS | TS | RD | KIT | TL |
| QT473911.1 | LDY | GC | CCNNMM | GTFS | RV | TG | VT | GT | SPHSITLRVMYRAI | KVRAW | PR | LR | NP | YF | LK | NP | NY | KG | ND | IK | TS | TS | RD | KIT | TL |
| QT473910.1 | LDY | GC | CCNNMM | GTFS | RV | TG | VT | GT | SPHSITLRVMYRAI | KVRAW | PR | LR | NP | YF | LK | NP | NY | KG | ND | IK | TS | TS | RD | KIT | TL |
| QW15916.1  | LDY | GC | CCNNMM | GTFS | RV | TG | VT | GT | SPHSITLRVMYRAI | KVRAW | PR | LR | NP | YF | LK | NP | NY | KG | ND | IK | TS | TS | RD | KIT | TL |
| QW15915.1  | LDY | GC | CCNNMM | GTFS | RV | TG | VT | GT | SPHSITLRVMYRAI | KVRAW | PR | LR | NP | YF | LK | NP | NY | KG | ND | IK | TS | TS | RD | KIT | TL |
| QW15835.1  | LDY | GC | CCNNMM | GTFS | RV | TG | VT | GT | SPHSITLRVMYRAI | KVRAW | PR | LR | NP | YF | LK | NP | NY | KG | ND | IK | TS | TS | RD | KIT | TL |
| QW15834.1  | LDY | GC | CCNNMM | GTFS | RV | TG | VT | GT | SPHSITLRVMYRAI | KVRAW | PR | LR | NP | YF | LK | NP | NY | KG | ND | IK | TS | TS | RD | KIT | TL |
| QW15830.1  | LDY | GC | CCNNMM | GTFS | RV | TG | VT | GT | SPHSITLRVMYRAI | KVRAW | PR | LR | NP | YF | LK | NP | NY | KG | ND | IK | TS | TS | RD | KIT | TL |
| QW15829.1  | LDY | GC | CCNNMM | GTFS | RV | TG | VT | GT | SPHSITLRVMYRAI | KVRAW | PR | LR | NP | YF | LK | NP | NY | KG | ND | IK | TS | TS | RD | KIT | TL |
| QW15826.1  | LDY | GC | CCNNMM | GTFS | RV | TG | VT | GT | SPHSITLRVMYRAI | KVRAW | PR | LR | NP | YF | LK | NP | NY | KG | ND | IK | TS | TS | RD | KIT | TL |
| QW15802.1  | LDY | GC | CCNNMM | GTFS | RV | TG | VT | GT | SPHSITLRVMYRAI | KVRAW |    |    |    |    |    |    |    |    |    |    |    |    |    |     |    |

[illegible]





[illegible]

[illegible]



|              |              |       |          |                |        |     |       |           |           |         |        |        |
|--------------|--------------|-------|----------|----------------|--------|-----|-------|-----------|-----------|---------|--------|--------|
| QWY16174.1   | LNYYQCPCNNMK | GTFC  | RMVSGVS. | TGKDVTVIRIFMLK | KIVRAW | PPR | PIRSQ | PYLLKNYP  | NPFDKANIV | DASSNRT | SIVTT  | ITTT   |
| QWY16171.1   | LNYYQCPCNNMK | GTFC  | RMVSGVS. | TGKDVTVIRIFMLK | KIVRAW | PPR | PIRSQ | PYLLKNYP  | NPFDKANIV | DASSNRT | SIVTT  | ITTT   |
| QWY16173.1   | LNYYQCPCNNMK | GTFC  | RMVSGVS. | TGKDVTVIRIFMLK | KIVRAW | PPR | PIRSQ | PYLLKNYP  | NPFDKANIV | DASSNRT | SIVTT  | ITTT   |
| QWY16172.1   | LNYYQCPCNNMK | GTFC  | RMVSGVS. | TGKDVTVIRIFMLK | KIVRAW | PPR | PIRSQ | PYLLKNYP  | NPFDKANIV | DASSNRT | SIVTT  | ITTT   |
| QWY16170.1   | LNYYQCPCNNMK | GTFC  | RMVSGVS. | TGKDVTVIRIFMLK | KIVRAW | PPR | PIRSQ | PYLLKNYP  | NPFDKANIV | DASSNRT | SIVTT  | ITTT   |
| QWY16169.1   | LNYYQCPCNNMK | GTFC  | RMVSGVS. | TGKDVTVIRIFMLK | KIVRAW | PPR | PIRSQ | PYLLKNYP  | NPFDKANIV | DASSNRT | SIVTT  | ITTT   |
| QWY16168.1   | LNYYQCPCNNMK | GTFC  | RMVSGVS. | TGKDVTVIRIFMLK | KIVRAW | PPR | PIRSQ | PYLLKNYP  | NPFDKANIV | DASSNRT | SIVTT  | ITTT   |
| QXP31588.1   | MNYYQCPCNNMK | GTFC  | RMVSGEA. | SGKNITVIRIFMLR | KIVRAW | PPR | PIRSQ | LYLLKNYP  | NPFNDTIL  | NASHNRT | SITANT | ITTT   |
| QXP31587.1   | MNYYQCPCNNMK | GTFC  | RMVSGEA. | SGKNITVIRIFMLR | KIVRAW | PPR | PIRSQ | LYLLKNYP  | NPFNDTIL  | NASHNRT | SITANT | ITTT   |
| QWY16175.1   | TTYYLCPCNNMK | GTFA  | RVVSGRA. | SOLKLTQIRVYML  | KIVRAW | PPR | PIRSQ | PYLLKNYP  | NPFDKANIV | DASSNRT | SIVTT  | ITTT   |
| QWY16174.1   | TTYYLCPCNNMK | GTFA  | RVVSGRA. | SOLKLTQIRVYML  | KIVRAW | PPR | PIRSQ | PYLLKNYP  | NPFDKANIV | DASSNRT | SIVTT  | ITTT   |
| pdb 6AKS A   | TDYYLCPCNNMK | GTFA  | RVVSGRA. | SOLKLTQIRVYML  | KIVRAW | PPR | PIRSQ | PYLLKNYP  | NPFDKANIV | DASSNRT | SIVTT  | ITTT   |
| BCD33944.1   | .DYGRINSSDH  | GHLA  | RAVAPLA. | TEGVVLRVYAKP   | KIVRAW | PPR | PIRSQ | PYLLKNYP  | NPFDKANIV | DASSNRT | SIVTT  | ITTT   |
| pdb 7ECY A   | GLYYINPADTI  | IGNLC | RVINEHP  | VGFTTVTVRVYMKP | KIKAWP | PPR | PRTLP | MYSIANANY | KGKERAP   | PALSAI  | IGNRDS | IGNRDS |
| pdb 7ECS A   | GLYYINPADTI  | IGNLC | RVINEHP  | VGFTTVTVRVYMKP | KIKAWP | PPR | PRTLP | MYSIANANY | KGKERAP   | PALSAI  | IGNRDS | IGNRDS |
| pdb 7EBR A   | GLYYINPADTI  | IGNLC | RVINEHP  | VGFTTVTVRVYMKP | KIKAWP | PPR | PRTLP | MYSIANANY | KGKERAP   | PALSAI  | IGNRDS | IGNRDS |
| pdb 6MZ A    | GLYYINPADTI  | IGNLC | RVINEHP  | VGFTTVTVRVYMKP | KIKAWP | PPR | PRTLP | MYSIANANY | KGKERAP   | PALSAI  | IGNRDS | IGNRDS |
| pdb 6CSH A   | GLYYINPADTI  | IGNLC | RVINEHP  | VGFTTVTVRVYMKP | KIKAWP | PPR | PRTLP | MYSIANANY | KGKERAP   | PALSAI  | IGNRDS | IGNRDS |
| pdb 6CSA A   | GLYYINPADTI  | IGNLC | RVINEHP  | VGFTTVTVRVYMKP | KIKAWP | PPR | PRTLP | MYSIANANY | KGKERAP   | PALSAI  | IGNRDS | IGNRDS |
| pdb 6CSB A   | GLYYINPADTI  | IGNLC | RVINEHP  | VGFTTVTVRVYMKP | KIKAWP | PPR | PRTLP | MYSIANANY | KGKERAP   | PALSAI  | IGNRDS | IGNRDS |
| pdb 6CS5 A   | GLYYINPADTI  | IGNLC | RVINEHP  | VGFTTVTVRVYMKP | KIKAWP | PPR | PRTLP | MYSIANANY | KGKERAP   | PALSAI  | IGNRDS | IGNRDS |
| pdb 6CS4 A   | GLYYINPADTI  | IGNLC | RVINEHP  | VGFTTVTVRVYMKP | KIKAWP | PPR | PRTLP | MYSIANANY | KGKERAP   | PALSAI  | IGNRDS | IGNRDS |
| pdb 6CS3 A   | GLYYINPADTI  | IGNLC | RVINEHP  | VGFTTVTVRVYMKP | KIKAWP | PPR | PRTLP | MYSIANANY | KGKERAP   | PALSAI  | IGNRDS | IGNRDS |
| pdb 6CRU A   | GLYYINPADTI  | IGNLC | RVINEHP  | VGFTTVTVRVYMKP | KIKAWP | PPR | PRTLP | MYSIANANY | KGKERAP   | PALSAI  | IGNRDS | IGNRDS |
| pdb 6CRS A   | GLYYINPADTI  | IGNLC | RVINEHP  | VGFTTVTVRVYMKP | KIKAWP | PPR | PRTLP | MYSIANANY | KGKERAP   | PALSAI  | IGNRDS | IGNRDS |
| pdb 6CR4 A   | GLYYINPADTI  | IGNLC | RVINEHP  | VGFTTVTVRVYMKP | KIKAWP | PPR | PRTLP | MYSIANANY | KGKERAP   | PALSAI  | IGNRDS | IGNRDS |
| pdb 6CRP A   | GLYYINPADTI  | IGNLC | RVINEHP  | VGFTTVTVRVYMKP | KIKAWP | PPR | PRTLP | MYSIANANY | KGKERAP   | PALSAI  | IGNRDS | IGNRDS |
| QNO39042.1   | GLYYINPADTI  | IGNLC | RVINEHP  | VGFTTVTVRVYMKP | KIKAWP | PPR | PRTLP | MYSIANANY | KGKERAP   | PALSAI  | IGNRDS | IGNRDS |
| QNO39041.1   | GLYYINPADTI  | IGNLC | RVINEHP  | VGFTTVTVRVYMKP | KIKAWP | PPR | PRTLP | MYSIANANY | KGKERAP   | PALSAI  | IGNRDS | IGNRDS |
| QNO39040.1   | GLYYINPADTI  | IGNLC | RVINEHP  | VGFTTVTVRVYMKP | KIKAWP | PPR | PRTLP | MYSIANANY | KGKERAP   | PALSAI  | IGNRDS | IGNRDS |
| QNO39039.1   | GLYYINPADTI  | IGNLC | RVINEHP  | VGFTTVTVRVYMKP | KIKAWP | PPR | PRTLP | MYSIANANY | KGKERAP   | PALSAI  | IGNRDS | IGNRDS |
| QNO39038.1   | GLYYINPADTI  | IGNLC | RVINEHP  | VGFTTVTVRVYMKP | KIKAWP | PPR | PRTLP | MYSIANANY | KGKERAP   | PALSAI  | IGNRDS | IGNRDS |
| CAA1527135.1 | GLYYINPADTI  | IGNLC | RVINEHP  | VGFTTVTVRVYMKP | KIKAWP | PPR | PRTLP | MYSIANANY | KGKERAP   | PALSAI  | IGNRDS | IGNRDS |
| CAA1527335.1 | GLYYINPADTI  | IGNLC | RVINEHP  | VGFTTVTVRVYMKP | KIKAWP | PPR | PRTLP | MYSIANANY | KGKERAP   | PALSAI  | IGNRDS | IGNRDS |
| CAA152736.1  |              |       |          |                |        |     |       |           |           |         |        |        |

QUS47950.1

|            |       |
|------------|-------|
| QUS47950.1 | ..... |
| QWY16112.1 | ..... |
| QWY16110.1 | ..... |
| QWY16109.1 | ..... |
| QWY16107.1 | ..... |
| QWY16106.1 | ..... |
| QWY16105.1 | ..... |
| QWY16104.1 | ..... |
| QNN25841.1 | ..... |
| QNN25838.1 | ..... |
| QNN25837.1 | ..... |
| QNN25842.1 | ..... |
| QNN25843.1 | ..... |
| QWY16092.1 | ..... |
| QWY16090.1 | ..... |
| QWY16084.1 | ..... |
| QWY16083.1 | ..... |
| QWY16081.1 | ..... |
| QWY16080.1 | ..... |
| QWY16079.1 | ..... |
| QWY16078.1 | ..... |
| QWY16075.1 | ..... |
| QWY16074.1 | ..... |
| QWY16056.1 | ..... |
| QWY16147.1 | ..... |
| QWY16146.1 | ..... |
| QOP74909.1 | ..... |
| QUS47948.1 | ..... |
| QUS47947.1 | ..... |
| QUS47946.1 | ..... |
| QUS47944.1 | ..... |
| QUS47942.1 | ..... |
| QUS47941.1 | ..... |
| QUS47940.1 | ..... |
| QUS47939.1 | ..... |
| QUS47928.1 | ..... |
| QUS47926.1 | ..... |
| QUS47921.1 | ..... |
| QUS47920.1 | ..... |
| QNN25845.1 | ..... |
| QNN25836.1 | ..... |
| QWY16162.1 | ..... |
| QWY16161.1 | ..... |
| QWY16159.1 | ..... |
| QWY16158.1 | ..... |
| QWY16155.1 | ..... |
| QWY16153.1 | ..... |
| QWY16151.1 | ..... |
| QWY16145.1 | ..... |
| QWY16143.1 | ..... |
| QWY16142.1 | ..... |
| QWY16139.1 | ..... |
| QWY16138.1 | ..... |
| QWY16135.1 | ..... |
| QWY16134.1 | ..... |
| QWY16133.1 | ..... |
| QWY16132.1 | ..... |
| QWY16131.1 | ..... |
| QWY16130.1 | ..... |
| QWY16129.1 | ..... |
| QWY16127.1 | ..... |
| QWY16125.1 | ..... |
| QWY16123.1 | ..... |
| QWY16121.1 | ..... |
| QWY16118.1 | ..... |
| QWY16117.1 | ..... |
| QWY16116.1 | ..... |
| QWY16099.1 | ..... |
| QWY16096.1 | ..... |
| QWY16095.1 | ..... |
| QWY16085.1 | ..... |
| QWY16077.1 | ..... |
| QWY16072.1 | ..... |
| QWY16071.1 | ..... |
| QWY16064.1 | ..... |
| QWY16059.1 | ..... |
| QWY16054.1 | ..... |
| QWY16052.1 | ..... |
| QWY16051.1 | ..... |
| QWY16050.1 | ..... |
| QWY16046.1 | ..... |
| QWY16045.1 | ..... |
| QWY16041.1 | ..... |
| QWY16040.1 | ..... |
| QWY16032.1 | ..... |
| QWY16017.1 | ..... |
| QWY16016.1 | ..... |
| QWY16015.1 | ..... |
| QTA73890.1 | ..... |
| QTA73885.1 | ..... |
| BCG67033.1 | ..... |
| BBU37474.1 | ..... |
| BBU37473.1 | ..... |
| BBU37471.1 | ..... |
| BBU37469.1 | ..... |
| BBU37468.1 | ..... |
| BBU37467.1 | ..... |
| BBU37466.1 | ..... |
| BBU37465.1 | ..... |
| BBU37464.1 | ..... |
| BBU37463.1 | ..... |
| QOP74908.1 | ..... |
| QOP74907.1 | ..... |
| QOP74903.1 | ..... |
| QOP74902.1 | ..... |
| QOP74899.1 | ..... |
| QOP74896.1 | ..... |
| QWY16156.1 | ..... |
| QUS47932.1 | ..... |
| QWY16136.1 | ..... |
| QWY16044.1 | ..... |
| QUS47923.1 | ..... |
| QWY16152.1 | ..... |
| QWY16124.1 | ..... |
| QWY16018.1 | ..... |
| BBU37475.1 | ..... |
| QUS47938.1 | ..... |
| QWY16076.1 | ..... |
| QWY16122.1 | ..... |
| QOP74905.1 | ..... |
| QWY16160.1 | ..... |
| QWY16070.1 | ..... |
| QWY16068.1 | ..... |
| QWY16066.1 | ..... |
| QWY16062.1 | ..... |
| QWY16034.1 | ..... |
| QTA73887.1 | ..... |
| QTA73883.1 | ..... |
| BBU37478.1 | ..... |
| BBU37470.1 | ..... |
| QWY16103.1 | ..... |
| QWY16065.1 | ..... |
| QTA73886.1 | ..... |
| QWY16113.1 | ..... |
| QWY16111.1 | ..... |
| QWY16098.1 | ..... |
| QWY16060.1 | ..... |
| QUS47945.1 | ..... |
| QOP74904.1 | ..... |
| QUS47924.1 | ..... |
| QWY15991.1 | ..... |
| QWY15985.1 | ..... |
| QWY16165.1 | ..... |
| QWY16038.1 | ..... |

|            |       |
|------------|-------|
| QWY16036.1 | ..... |
| QWY16120.1 | ..... |
| QWY16119.1 | ..... |
| QWY16102.1 | ..... |
| QWY16100.1 | ..... |
| QWY16097.1 | ..... |
| QWY16101.1 | ..... |
| BBU37472.1 | ..... |
| QWY16108.1 | ..... |
| QWY16042.1 | ..... |
| QOP74910.1 | ..... |
| QWY16128.1 | ..... |
| QUS47905.1 | ..... |
| QWY16154.1 | ..... |
| QWY16126.1 | ..... |
| QWY16049.1 | ..... |
| QWY16043.1 | ..... |
| QUS47911.1 | ..... |
| BBU37477.1 | ..... |
| QWY16137.1 | ..... |
| QWY16061.1 | ..... |
| QTA73882.1 | ..... |
| QWY16031.1 | ..... |
| BBU37476.1 | ..... |
| QUS47949.1 | ..... |
| QNN25833.1 | ..... |
| QWY16114.1 | ..... |
| QWY16063.1 | ..... |
| QTA73884.1 | ..... |
| QWY16002.1 | ..... |
| QWY15984.1 | ..... |
| QUS47934.1 | ..... |
| QUS47933.1 | ..... |
| QUS47929.1 | ..... |
| QUS47927.1 | ..... |
| QUS47919.1 | ..... |
| QUS47917.1 | ..... |
| QUS47915.1 | ..... |
| QUS47913.1 | ..... |
| QWY16166.1 | ..... |
| QWY16164.1 | ..... |
| QWY16163.1 | ..... |
| QWY16157.1 | ..... |
| QWY16150.1 | ..... |
| QWY16115.1 | ..... |
| QWY16087.1 | ..... |
| QWY16069.1 | ..... |
| QWY16058.1 | ..... |
| QWY16048.1 | ..... |
| QWY16047.1 | ..... |
| QWY16030.1 | ..... |
| QWY16027.1 | ..... |
| QWY16021.1 | ..... |
| QWY16020.1 | ..... |
| QWY16009.1 | ..... |
| QWY16008.1 | ..... |
| QWY16007.1 | ..... |
| QWY16001.1 | ..... |
| QWY16000.1 | ..... |
| QWY15993.1 | ..... |
| QWY15986.1 | ..... |
| QWY15979.1 | ..... |
| QTA73889.1 | ..... |
| QTA73874.1 | ..... |
| QTA73871.1 | ..... |
| QOP74901.1 | ..... |
| QOP74900.1 | ..... |
| QOP74897.1 | ..... |
| QOP74893.1 | ..... |
| QOP74887.1 | ..... |
| QOP74886.1 | ..... |
| QOP74884.1 | ..... |
| QOP74882.1 | ..... |
| QOP74881.1 | ..... |
| QOP74880.1 | ..... |
| QOP74879.1 | ..... |
| QOP74878.1 | ..... |
| pdb 4YVS M | ..... |
| pdb 4YVS J | ..... |
| pdb 4YVS G | ..... |
| pdb 4YVS D | ..... |
| pdb 4YVS A | ..... |
| pdb 4CEY A | ..... |
| pdb 4CEW A | ..... |
| pdb 4N53 A | ..... |
| pdb 4N43 A | ..... |
| pdb 4RQP A | ..... |
| pdb 4RQP M | ..... |
| pdb 4RQP I | ..... |
| pdb 4RQP Q | ..... |
| pdb 4RQP E | ..... |
| QWY16033.1 | ..... |
| QWY16029.1 | ..... |
| QWY16028.1 | ..... |
| QWY16025.1 | ..... |
| QUS47943.1 | ..... |
| QOP74914.1 | ..... |
| QUS47916.1 | ..... |
| QWY16148.1 | ..... |
| QOP74906.1 | ..... |
| QOP74895.1 | ..... |
| QOP74890.1 | ..... |
| QOP74889.1 | ..... |
| QWY16149.1 | ..... |
| QOP74888.1 | ..... |
| QOP74894.1 | ..... |
| QUS47930.1 | ..... |
| QWY16053.1 | ..... |
| QWY15997.1 | ..... |
| QWY15996.1 | ..... |
| QWY15995.1 | ..... |
| QTA73878.1 | ..... |
| QTA73877.1 | ..... |
| QTA73876.1 | ..... |
| QUS47914.1 | ..... |
| QWY16003.1 | ..... |
| QWY16067.1 | ..... |
| QWY16057.1 | ..... |
| QTA73888.1 | ..... |
| QWY16086.1 | ..... |
| pdb 4GMP I | ..... |
| pdb 3J91 I | ..... |
| QWY16094.1 | ..... |
| QWY16093.1 | ..... |
| QWY16091.1 | ..... |
| QWY16088.1 | ..... |
| QWY16082.1 | ..... |
| QWY16073.1 | ..... |
| QWY16055.1 | ..... |
| QUS47918.1 | ..... |
| QWY16089.1 | ..... |
| QWY16037.1 | ..... |
| QOP74891.1 | ..... |
| pdb 3VB8 A | ..... |
| pdb 3VB0 A | ..... |
| pdb 3VBH A | ..... |
| pdb 3VBF A | ..... |
| pdb 6LQD A | ..... |
| pdb 5ZUF A | ..... |
| pdb 5ZUD A | ..... |
| pdb 4CDX A | ..... |
| pdb 4CDW A | ..... |
| pdb 4CDU A | ..... |
| pdb 4CDQ A | ..... |



|            |       |
|------------|-------|
| QOP74885.1 | ..... |
| QWY16026.1 | ..... |
| QWY15977.1 | ..... |
| QTA73869.1 | ..... |
| QUS47935.1 | ..... |
| QWY16024.1 | ..... |
| QWY16023.1 | ..... |
| QWY16022.1 | ..... |
| QWY16013.1 | ..... |
| QWY16012.1 | ..... |
| QWY15992.1 | ..... |
| QWY15982.1 | ..... |
| QWY15981.1 | ..... |
| QWY15976.1 | ..... |
| QTA73880.1 | ..... |
| QTA73872.1 | ..... |
| QTA73868.1 | ..... |
| QOP74892.1 | ..... |
| QWY15998.1 | ..... |
| QWY15994.1 | ..... |
| QTA73879.1 | ..... |
| QTA73875.1 | ..... |
| QWY16006.1 | ..... |
| QWY16005.1 | ..... |
| QWY16039.1 | ..... |
| QWY15999.1 | ..... |
| QWY16004.1 | ..... |
| QOP74913.1 | ..... |
| QOP74915.1 | ..... |
| QWY16035.1 | ..... |
| QWY15990.1 | ..... |
| QWY15988.1 | ..... |
| QWY15989.1 | ..... |
| QWY15987.1 | ..... |
| QWY15978.1 | ..... |
| QTA73870.1 | ..... |
| QWY15983.1 | ..... |
| QUS47931.1 | ..... |
| QUS47925.1 | ..... |
| QUS47922.1 | ..... |
| QWY16014.1 | ..... |
| QTA73881.1 | ..... |
| QOP74898.1 | ..... |
| QWY15980.1 | ..... |
| QTA73873.1 | ..... |
| QWY16011.1 | ..... |
| QWY16010.1 | ..... |
| QOP74911.1 | ..... |
| QWY16019.1 | ..... |
| QOP74883.1 | ..... |
| QUS47909.1 | ..... |
| QWY16144.1 | ..... |
| QUS47908.1 | ..... |
| QNN25844.1 | ..... |
| QNN25840.1 | ..... |
| QNN25839.1 | ..... |
| QNN25835.1 | ..... |
| QNN25834.1 | ..... |
| QOP74912.1 | ..... |
| QUS47910.1 | ..... |
| QUS47907.1 | ..... |
| QWY16141.1 | ..... |
| QWY16140.1 | ..... |
| QUS47937.1 | ..... |
| QUS47936.1 | ..... |
| QUS47912.1 | ..... |
| QUS47906.1 | ..... |
| pdb 4XVW M | ..... |
| pdb 4XVW J | ..... |
| pdb 4XVW D | ..... |
| pdb 4XVW A | ..... |
| pdb 4XVW E | ..... |
| QPI19797.1 | ..... |
| QPI19781.1 | ..... |
| QPI19795.1 | ..... |
| QPI19794.1 | ..... |
| QPI19793.1 | ..... |
| QPI19792.1 | ..... |
| QPI19790.1 | ..... |
| QPI19789.1 | ..... |
| QPI19788.1 | ..... |
| QPI19787.1 | ..... |
| QPI19785.1 | ..... |
| QPI19784.1 | ..... |
| QPI19782.1 | ..... |
| QPI19780.1 | ..... |
| QPI19777.1 | ..... |
| QPI19762.1 | ..... |
| QPI19755.1 | ..... |
| QPI19754.1 | ..... |
| QPI19748.1 | ..... |
| QPI19747.1 | ..... |
| QPI19744.1 | ..... |
| QPI19743.1 | ..... |
| QPI19739.1 | ..... |
| QPI19778.1 | ..... |
| QPI19796.1 | ..... |
| QPI19753.1 | ..... |
| QPI19791.1 | ..... |
| QPI19786.1 | ..... |
| QPI19779.1 | ..... |
| QPI19742.1 | ..... |
| pdb 4AED A | ..... |
| pdb 3ZFF A | ..... |
| pdb 6DIZ A | ..... |
| pdb 6UH7 A | ..... |
| pdb 6UH6 A | ..... |
| pdb 6UH1 A | ..... |
| QPI19783.1 | ..... |
| QPI19772.1 | ..... |
| QPI19771.1 | ..... |
| QPI19764.1 | ..... |
| QPI19760.1 | ..... |
| QPI19759.1 | ..... |
| QPI19756.1 | ..... |
| QPI19752.1 | ..... |
| QPI19740.1 | ..... |
| QPI19738.1 | ..... |
| QPI19757.1 | ..... |
| QPI19750.1 | ..... |
| QPI19751.1 | ..... |
| QPI19746.1 | ..... |
| QPI19737.1 | ..... |
| QPI19776.1 | ..... |
| QPI19774.1 | ..... |
| QPI19773.1 | ..... |
| QPI19770.1 | ..... |
| QPI19769.1 | ..... |
| QPI19768.1 | ..... |
| QPI19767.1 | ..... |
| QPI19766.1 | ..... |
| QPI19763.1 | ..... |
| QPI19761.1 | ..... |
| QPI19765.1 | ..... |
| QPI19775.1 | ..... |
| QPI19758.1 | ..... |
| QPI19736.1 | ..... |
| QPI19735.1 | ..... |
| QPI19749.1 | ..... |
| QPI19741.1 | ..... |
| QPI19745.1 | ..... |
| pdb 6Z3Q A | ..... |
| pdb 6Z3P A | ..... |
| pdb 6I2K A | ..... |

|            |       |
|------------|-------|
| QWFO8740.1 | ..... |
| QWFO8739.1 | ..... |
| QWFO8760.1 | ..... |
| QWFO8759.1 | ..... |
| QWFO8762.1 | ..... |
| QWFO8761.1 | ..... |
| QWFO8764.1 | ..... |
| QWFO8763.1 | ..... |
| QWFO8773.1 | ..... |
| QWFO8749.1 | ..... |
| QWFO8785.1 | ..... |
| QWFO8783.1 | ..... |
| QWFO8787.1 | ..... |
| QWFO8765.1 | ..... |
| QWFO8792.1 | ..... |
| QWFO8767.1 | ..... |
| QWFO8793.1 | ..... |
| QWFO8758.1 | ..... |
| QWFO8845.1 | ..... |
| QWFO8844.1 | ..... |
| QWFO8847.1 | ..... |
| QWFO8846.1 | ..... |
| QWFO8852.1 | ..... |
| QWFO8843.1 | ..... |
| QWFO8857.1 | ..... |
| QWFO8856.1 | ..... |
| QWFO8865.1 | ..... |
| QWFO8738.1 | ..... |
| QWFO8872.1 | ..... |
| QWFO8871.1 | ..... |
| QWFO8879.1 | ..... |
| QWFO8877.1 | ..... |
| QWFO8880.1 | ..... |
| QWFO8851.1 | ..... |
| QWFO8882.1 | ..... |
| QWFO8867.1 | ..... |
| QWFO8884.1 | ..... |
| QWFO8875.1 | ..... |
| QWFO8885.1 | ..... |
| QWFO8863.1 | ..... |
| QWFO8890.1 | ..... |
| QWFO8889.1 | ..... |
| QWFO8896.1 | ..... |
| QWFO8752.1 | ..... |
| QWFO8900.1 | ..... |
| QWFO8899.1 | ..... |
| QWFO8908.1 | ..... |
| QWFO8906.1 | ..... |
| QWFO8910.1 | ..... |
| QWFO8870.1 | ..... |
| QWFO8915.1 | ..... |
| QWFO8750.1 | ..... |
| QWFO8917.1 | ..... |
| QWFO8916.1 | ..... |
| QWFO8923.1 | ..... |
| QWFO8921.1 | ..... |
| QWFO8926.1 | ..... |
| QWFO8780.1 | ..... |
| QWFO8932.1 | ..... |
| QWFO8931.1 | ..... |
| QWFO8945.1 | ..... |
| QWFO8938.1 | ..... |
| QWFO8955.1 | ..... |
| QWFO8954.1 | ..... |
| QWFO8967.1 | ..... |
| QWFO8959.1 | ..... |
| QYC65038.1 | ..... |
| QYC65037.1 | ..... |
| QYC65039.1 | ..... |
| QYC65034.1 | ..... |
| QYC65043.1 | ..... |
| QYC65041.1 | ..... |
| QYC65047.1 | ..... |
| QYC65046.1 | ..... |
| QYC65050.1 | ..... |
| QYC65049.1 | ..... |
| QYC65051.1 | ..... |
| QYC65045.1 | ..... |
| QYC65058.1 | ..... |
| QYC65055.1 | ..... |
| QYC65060.1 | ..... |
| QYC65059.1 | ..... |
| QYC65062.1 | ..... |
| QYC65061.1 | ..... |
| QYC65063.1 | ..... |
| QYC65053.1 | ..... |
| QYC65069.1 | ..... |
| QYC65068.1 | ..... |
| QYC65071.1 | ..... |
| QYC65070.1 | ..... |
| QYC65074.1 | ..... |
| QYC65066.1 | ..... |
| QYC65079.1 | ..... |
| QYC65073.1 | ..... |
| QYC65081.1 | ..... |
| QYC65078.1 | ..... |
| QYC65086.1 | ..... |
| QYC65085.1 | ..... |
| QYC65088.1 | ..... |
| QYC65087.1 | ..... |
| QYC65101.1 | ..... |
| QYC65093.1 | ..... |
| QYC65107.1 | ..... |
| QYC65104.1 | ..... |
| QYC65113.1 | ..... |
| QYC65106.1 | ..... |
| QYC65120.1 | ..... |
| QYC65118.1 | ..... |
| QYC65121.1 | ..... |
| QYC65111.1 | ..... |
| QYC65125.1 | ..... |
| QYC65117.1 | ..... |
| QYC65135.1 | ..... |
| QYC65134.1 | ..... |
| QYC65151.1 | ..... |
| QYC65150.1 | ..... |
| QYC65153.1 | ..... |
| QYC65152.1 | ..... |
| QYC65155.1 | ..... |
| QYC65154.1 | ..... |
| QYC65156.1 | ..... |
| QYC65142.1 | ..... |
| QYC65161.1 | ..... |
| QYC65160.1 | ..... |
| QYC65165.1 | ..... |
| QYC65164.1 | ..... |
| QYC65167.1 | ..... |
| QYC65166.1 | ..... |
| BCB92151.1 | ..... |
| BBU37462.1 | ..... |
| BBU37461.1 | ..... |
| BBU37459.1 | ..... |
| BBU37458.1 | ..... |
| BBU37457.1 | ..... |
| QWFO8838.1 | ..... |
| QWFO8828.1 | ..... |
| BCG66989.1 | ..... |
| BCG66987.1 | ..... |
| BCB92159.1 | ..... |
| BBU37456.1 | ..... |
| QWY15683.1 | ..... |
| QWY15682.1 | ..... |
| QWY15681.1 | ..... |
| QWY15680.1 | ..... |

|            |       |
|------------|-------|
| QWY15692.1 | ..... |
| QWY15671.1 | ..... |
| QWY15691.1 | ..... |
| QWY15690.1 | ..... |
| QWY15696.1 | ..... |
| QWY15695.1 | ..... |
| QWY15694.1 | ..... |
| QWY15678.1 | ..... |
| QWY15703.1 | ..... |
| QWY15701.1 | ..... |
| QWY15699.1 | ..... |
| QWY15673.1 | ..... |
| QWY15715.1 | ..... |
| QWY15714.1 | ..... |
| QWY15706.1 | ..... |
| QWY15705.1 | ..... |
| QTA73914.1 | ..... |
| QWY15948.1 | ..... |
| QWF08837.1 | ..... |
| QWF08804.1 | ..... |
| QWF08805.1 | ..... |
| QWF08840.1 | ..... |
| QWY15792.1 | ..... |
| QTA73903.1 | ..... |
| QTA73902.1 | ..... |
| QTA73896.1 | ..... |
| QTA73894.1 | ..... |
| QWY15940.1 | ..... |
| QWY15928.1 | ..... |
| QWY15894.1 | ..... |
| BCG67001.1 | ..... |
| QWY15872.1 | ..... |
| QWY15871.1 | ..... |
| QWY15870.1 | ..... |
| QWY15869.1 | ..... |
| QWY15866.1 | ..... |
| BCB92155.1 | ..... |
| QWY15862.1 | ..... |
| QWY15861.1 | ..... |
| QWY15852.1 | ..... |
| QWY15828.1 | ..... |
| QWY15839.1 | ..... |
| QWY15834.1 | ..... |
| QWY15810.1 | ..... |
| QWY15809.1 | ..... |
| QWY15807.1 | ..... |
| QWY15806.1 | ..... |
| QWY15805.1 | ..... |
| QWY15803.1 | ..... |
| QWY15793.1 | ..... |
| QYC65185.1 | ..... |
| QWY15754.1 | ..... |
| QWY15736.1 | ..... |
| QWY15753.1 | ..... |
| QYC65174.1 | ..... |
| QWY15730.1 | ..... |
| QWY15729.1 | ..... |
| QWY15727.1 | ..... |
| QWY15726.1 | ..... |
| QWY15725.1 | ..... |
| QWY15724.1 | ..... |
| QWY15723.1 | ..... |
| QWY15721.1 | ..... |
| QWY15746.1 | ..... |
| QWY15745.1 | ..... |
| QWY15733.1 | ..... |
| QYC65131.1 | ..... |
| QWY15813.1 | ..... |
| QWY15811.1 | ..... |
| QTA73907.1 | ..... |
| QTA73906.1 | ..... |
| QOP74940.1 | ..... |
| QOP74938.1 | ..... |
| QOP74937.1 | ..... |
| QOP74934.1 | ..... |
| QOP74929.1 | ..... |
| QOP74924.1 | ..... |
| QOP74921.1 | ..... |
| QOP74932.1 | ..... |
| QOP74931.1 | ..... |
| QIL87531.1 | ..... |
| QIL87521.1 | ..... |
| QIL87523.1 | ..... |
| QIL87517.1 | ..... |
| QIL87540.1 | ..... |
| QIL87539.1 | ..... |
| QIH53921.1 | ..... |
| QIH53916.1 | ..... |
| BBH72194.1 | ..... |
| BBH72183.1 | ..... |
| BBH72107.1 | ..... |
| QWF08825.1 | ..... |
| QWF08823.1 | ..... |
| QWF08821.1 | ..... |
| QWF08818.1 | ..... |
| QWF08815.1 | ..... |
| QWF08813.1 | ..... |
| QWF08812.1 | ..... |
| QWF08810.1 | ..... |
| QWF08809.1 | ..... |
| QWF08808.1 | ..... |
| QWF08807.1 | ..... |
| QWF08797.1 | ..... |
| QWF08841.1 | ..... |
| QWF08830.1 | ..... |
| QTA73892.1 | ..... |
| QTA73901.1 | ..... |
| QWY15957.1 | ..... |
| UEP53406.1 | ..... |
| UEC49858.1 | ..... |
| QWY15931.1 | ..... |
| QWY15929.1 | ..... |
| QWY15880.1 | ..... |
| QWY15868.1 | ..... |
| BCI65368.1 | ..... |
| BCR43097.1 | ..... |
| BCG67047.1 | ..... |
| BCG67046.1 | ..... |
| BCG67041.1 | ..... |
| BCG67040.1 | ..... |
| BCG67039.1 | ..... |
| BCG67038.1 | ..... |
| BCG67032.1 | ..... |
| BCG67030.1 | ..... |
| BCG66995.1 | ..... |
| BCG66994.1 | ..... |
| QWY15757.1 | ..... |
| QWY15756.1 | ..... |
| QWY15748.1 | ..... |
| QWY15747.1 | ..... |
| QWY15720.1 | ..... |
| QWY15717.1 | ..... |
| QWY15697.1 | ..... |
| QWY15689.1 | ..... |
| QWY15761.1 | ..... |
| QWY15743.1 | ..... |
| QWY15759.1 | ..... |
| QWY15758.1 | ..... |
| QWY15677.1 | ..... |
| QWY15675.1 | ..... |
| QWY15776.1 | ..... |
| QWY15772.1 | ..... |
| QWY15770.1 | ..... |
| QWY15762.1 | ..... |



|            |       |
|------------|-------|
| QWY15732.1 | ..... |
| QWY15731.1 | ..... |
| QWY15780.1 | ..... |
| QWY15779.1 | ..... |
| BCG67006.1 | ..... |
| BCG67004.1 | ..... |
| BCG67019.1 | ..... |
| BCG67002.1 | ..... |
| BCG67036.1 | ..... |
| BCG67035.1 | ..... |
| QWY15785.1 | ..... |
| QWY15784.1 | ..... |
| QWY15789.1 | ..... |
| QYC65159.1 | ..... |
| BCR43101.1 | ..... |
| BCR43098.1 | ..... |
| QWY15873.1 | ..... |
| QWY15865.1 | ..... |
| QWY15900.1 | ..... |
| BCG67049.1 | ..... |
| UEC49853.1 | ..... |
| UEC49848.1 | ..... |
| QTA73899.1 | ..... |
| QTA73898.1 | ..... |
| QTA73905.1 | ..... |
| QTA73904.1 | ..... |
| QTA73909.1 | ..... |
| QTA73908.1 | ..... |
| UEP53408.1 | ..... |
| QWF08839.1 | ..... |
| QWF08799.1 | ..... |
| QWY15771.1 | ..... |
| QTA73891.1 | ..... |
| QWY15670.1 | ..... |
| BBH72149.1 | ..... |
| BBH72143.1 | ..... |
| BBH72163.1 | ..... |
| QTA73895.1 | ..... |
| QWY15674.1 | ..... |
| QWY15710.1 | ..... |
| QWY15709.1 | ..... |
| QWF08934.1 | ..... |
| QWF08836.1 | ..... |
| QLH02014.1 | ..... |
| QWF08796.1 | ..... |
| QYC65090.1 | ..... |
| QTA73900.1 | ..... |
| QWY15679.1 | ..... |
| QWY15751.1 | ..... |
| QWF08795.1 | ..... |
| QWF08789.1 | ..... |
| QYC65158.1 | ..... |
| QYC65109.1 | ..... |
| QWF08883.1 | ..... |
| QWF08866.1 | ..... |
| QWF08833.1 | ..... |
| QWF08801.1 | ..... |
| QWF08842.1 | ..... |
| QWF08806.1 | ..... |
| QYC65065.1 | ..... |
| QYC65044.1 | ..... |
| QWY15863.1 | ..... |
| QTA73916.1 | ..... |
| BCG66990.1 | ..... |
| QTA73915.1 | ..... |
| QWY15932.1 | ..... |
| QWY15867.1 | ..... |
| QWY15859.1 | ..... |
| QWY15858.1 | ..... |
| QWY15782.1 | ..... |
| QWY15781.1 | ..... |
| BCI65355.1 | ..... |
| BCI65374.1 | ..... |
| BCI65373.1 | ..... |
| BCI65372.1 | ..... |
| BCI65371.1 | ..... |
| BCI65369.1 | ..... |
| BCI65367.1 | ..... |
| BCI65365.1 | ..... |
| BCI65364.1 | ..... |
| BCI65363.1 | ..... |
| BCI65362.1 | ..... |
| BCI65361.1 | ..... |
| BCI65360.1 | ..... |
| BCI65359.1 | ..... |
| BCI65358.1 | ..... |
| BCI65356.1 | ..... |
| BCI65354.1 | ..... |
| BCI65353.1 | ..... |
| BCI65352.1 | ..... |
| BCI65351.1 | ..... |
| BCI65350.1 | ..... |
| BCI65349.1 | ..... |
| BCI65348.1 | ..... |
| BCI65347.1 | ..... |
| BCI65346.1 | ..... |
| BCI65345.1 | ..... |
| BCI65344.1 | ..... |
| BCI65343.1 | ..... |
| BCI65342.1 | ..... |
| BCI65341.1 | ..... |
| BCI65340.1 | ..... |
| BCI65339.1 | ..... |
| BCI65338.1 | ..... |
| BCI65337.1 | ..... |
| BCI65336.1 | ..... |
| BCI65335.1 | ..... |
| BCI65334.1 | ..... |
| BCI65333.1 | ..... |
| BCI65332.1 | ..... |
| BCI65331.1 | ..... |
| BCI65330.1 | ..... |
| BCI65328.1 | ..... |
| BCI65327.1 | ..... |
| BCI65326.1 | ..... |
| BCI65325.1 | ..... |
| BCI65324.1 | ..... |
| BCI65323.1 | ..... |
| BCI65322.1 | ..... |
| BCI65321.1 | ..... |
| BCI65320.1 | ..... |
| BCI65319.1 | ..... |
| BCI65318.1 | ..... |
| BCI65317.1 | ..... |
| QYC65119.1 | ..... |
| QWF08905.1 | ..... |
| QWF08814.1 | ..... |
| QWF08776.1 | ..... |
| BCI65370.1 | ..... |
| BCG67048.1 | ..... |
| QWY15933.1 | ..... |
| UEP53404.1 | ..... |
| UEC49857.1 | ..... |
| QYC65076.1 | ..... |
| QWF08819.1 | ..... |
| QYC65082.1 | ..... |
| QWY15927.1 | ..... |
| QOP74944.1 | ..... |
| QYC65139.1 | ..... |
| QYC65136.1 | ..... |
| QYC65130.1 | ..... |
| QYC65115.1 | ..... |
| QYC65114.1 | ..... |
| QYC65105.1 | ..... |

|             |       |
|-------------|-------|
| QWFO8949.1  | ..... |
| QWFO8928.1  | ..... |
| QWY15921.1  | ..... |
| QWY15919.1  | ..... |
| QYC65102.1  | ..... |
| BCR43082.1  | ..... |
| QWY15713.1  | ..... |
| BCI65329.1  | ..... |
| QWFO8887.1  | ..... |
| QYC65036.1  | ..... |
| QTA73913.1  | ..... |
| QWY15837.1  | ..... |
| QWY15738.1  | ..... |
| QTA73911.1  | ..... |
| QTA73910.1  | ..... |
| QWY15916.1  | ..... |
| QWY15915.1  | ..... |
| QWY15835.1  | ..... |
| QWY15832.1  | ..... |
| QWY15830.1  | ..... |
| QWY15829.1  | ..... |
| QWY15826.1  | ..... |
| QWY15802.1  | ..... |
| QWY15799.1  | ..... |
| QWY15788.1  | ..... |
| QWY15783.1  | ..... |
| QWY15768.1  | ..... |
| QWY15766.1  | ..... |
| QWY15764.1  | ..... |
| QWY15763.1  | ..... |
| QWY15760.1  | ..... |
| QWFO8768.1  | ..... |
| QWFO8766.1  | ..... |
| QWY15790.1  | ..... |
| QWFO8769.1  | ..... |
| QWY15930.1  | ..... |
| QWY15833.1  | ..... |
| QWY15827.1  | ..... |
| QWY15838.1  | ..... |
| BBUS37460.1 | ..... |
| QWFO8920.1  | ..... |
| QWY15769.1  | ..... |
| QWY15755.1  | ..... |
| QWY15702.1  | ..... |
| QWY15739.1  | ..... |
| QWY15737.1  | ..... |
| QWFO8788.1  | ..... |
| QYC65122.1  | ..... |
| QWFO8891.1  | ..... |
| QWY15903.1  | ..... |
| BCI65366.1  | ..... |
| BCG67045.1  | ..... |
| BCG67044.1  | ..... |
| QWY15819.1  | ..... |
| QWY15818.1  | ..... |
| QTA73912.1  | ..... |
| QWY15914.1  | ..... |
| QWY15909.1  | ..... |
| QWY15905.1  | ..... |
| QWY15856.1  | ..... |
| QWY15850.1  | ..... |
| QWY15849.1  | ..... |
| QWY15847.1  | ..... |
| QWY15845.1  | ..... |
| QWY15836.1  | ..... |
| QWY15765.1  | ..... |
| QWY15734.1  | ..... |
| QWY15855.1  | ..... |
| QWY15831.1  | ..... |
| QWY15798.1  | ..... |
| QWY15797.1  | ..... |
| QWY15796.1  | ..... |
| QWY15795.1  | ..... |
| QWY15794.1  | ..... |
| QWY15971.1  | ..... |
| QWY15897.1  | ..... |
| QWY15742.1  | ..... |
| QWY15741.1  | ..... |
| QWY15923.1  | ..... |
| QWFO8957.1  | ..... |
| UEP53407.1  | ..... |
| QWY15922.1  | ..... |
| QWY15848.1  | ..... |
| UEP53405.1  | ..... |
| UEC49855.1  | ..... |
| QWY15851.1  | ..... |
| QYC65112.1  | ..... |
| QOP74942.1  | ..... |
| QLH02013.1  | ..... |
| QIH53923.1  | ..... |
| QIH53918.1  | ..... |
| QIH53915.1  | ..... |
| QIH53914.1  | ..... |
| QYC65127.1  | ..... |
| QIL87534.1  | ..... |
| QWFO8936.1  | ..... |
| QIL87532.1  | ..... |
| QYC65089.1  | ..... |
| QWFO8950.1  | ..... |
| QIL87530.1  | ..... |
| QWFO8820.1  | ..... |
| QIL87529.1  | ..... |
| QIL87528.1  | ..... |
| QYC65143.1  | ..... |
| QIL87525.1  | ..... |
| QYC65141.1  | ..... |
| QYC65084.1  | ..... |
| QWFO8947.1  | ..... |
| QWFO8922.1  | ..... |
| QIL87524.1  | ..... |
| QIL87520.1  | ..... |
| QIL87518.1  | ..... |
| QYC65103.1  | ..... |
| QWFO8944.1  | ..... |
| QWFO8943.1  | ..... |
| QWFO8927.1  | ..... |
| QWFO8942.1  | ..... |
| QWFO8940.1  | ..... |
| QWFO8912.1  | ..... |
| QWFO8907.1  | ..... |
| QWFO8904.1  | ..... |
| QWFO8886.1  | ..... |
| QWY15877.1  | ..... |
| QWY15965.1  | ..... |
| UEC49851.1  | ..... |
| UEC49850.1  | ..... |
| UEC49849.1  | ..... |
| QWY15963.1  | ..... |
| QWY15972.1  | ..... |
| QWY15958.1  | ..... |
| QWY15899.1  | ..... |
| QWY15898.1  | ..... |
| QWY15895.1  | ..... |
| QWY15893.1  | ..... |
| QWY15892.1  | ..... |
| QWY15891.1  | ..... |
| QWY15970.1  | ..... |
| QWY15966.1  | ..... |
| QWY15962.1  | ..... |
| QWY15961.1  | ..... |
| QWY15925.1  | ..... |
| QWY15773.1  | ..... |
| QWY15924.1  | ..... |
| QWY15910.1  | ..... |

|            |       |
|------------|-------|
| QWY15824.1 | ..... |
| QWY15823.1 | ..... |
| QWY15822.1 | ..... |
| QWY15821.1 | ..... |
| QWY15816.1 | ..... |
| QWY15778.1 | ..... |
| QWY15801.1 | ..... |
| QWY15791.1 | ..... |
| QWY15775.1 | ..... |
| QWY15774.1 | ..... |
| BCR43107.1 | ..... |
| QYC65183.1 | ..... |
| BCR43094.1 | ..... |
| BCR43081.1 | ..... |
| BCG67017.1 | ..... |
| BCG67015.1 | ..... |
| BCG67007.1 | ..... |
| BCG67005.1 | ..... |
| QYC65184.1 | ..... |
| QWFO8853.1 | ..... |
| QYC65140.1 | ..... |
| QYC65133.1 | ..... |
| QYC65110.1 | ..... |
| QYC65108.1 | ..... |
| QYC65098.1 | ..... |
| QYC65097.1 | ..... |
| QYC65094.1 | ..... |
| QYC65091.1 | ..... |
| QYC65057.1 | ..... |
| QWFO8850.1 | ..... |
| QYC65056.1 | ..... |
| QWFO8849.1 | ..... |
| QWFO8969.1 | ..... |
| QWFO8848.1 | ..... |
| QWFO8968.1 | ..... |
| QWFO8965.1 | ..... |
| QWFO8956.1 | ..... |
| QWFO8952.1 | ..... |
| QWFO8903.1 | ..... |
| QWFO8902.1 | ..... |
| QWFO8895.1 | ..... |
| QWFO8888.1 | ..... |
| QWFO8893.1 | ..... |
| QWFO8892.1 | ..... |
| QWFO8876.1 | ..... |
| QWFO8868.1 | ..... |
| QWFO8862.1 | ..... |
| QWFO8861.1 | ..... |
| QWFO8860.1 | ..... |
| QWFO8859.1 | ..... |
| QWFO8858.1 | ..... |
| QWFO8854.1 | ..... |
| QWFO8929.1 | ..... |
| QYC65137.1 | ..... |
| QYC65100.1 | ..... |
| QWY15926.1 | ..... |
| QWFO8962.1 | ..... |
| QWFO8909.1 | ..... |
| QWY15854.1 | ..... |
| QWY15808.1 | ..... |
| QWFO8770.1 | ..... |
| QWY15728.1 | ..... |
| QYC65126.1 | ..... |
| QWFO8827.1 | ..... |
| QYC65072.1 | ..... |
| QYC65067.1 | ..... |
| QWY15767.1 | ..... |
| QWY15735.1 | ..... |
| BCR92153.1 | ..... |
| QWFO8966.1 | ..... |
| QIH53917.1 | ..... |
| QYC65092.1 | ..... |
| QWY15879.1 | ..... |
| QWY15777.1 | ..... |
| BCR43105.1 | ..... |
| QWFO8826.1 | ..... |
| BCG67024.1 | ..... |
| BCG66999.1 | ..... |
| QWY15752.1 | ..... |
| BCG67028.1 | ..... |
| BCG67027.1 | ..... |
| BCG66996.1 | ..... |
| BCG67026.1 | ..... |
| BCG67025.1 | ..... |
| BCG67023.1 | ..... |
| BCG67022.1 | ..... |
| BCG67021.1 | ..... |
| BCG67013.1 | ..... |
| BCG67000.1 | ..... |
| BCG66997.1 | ..... |
| BCG66998.1 | ..... |
| QWFO8924.1 | ..... |
| QIL87522.1 | ..... |
| QYC65075.1 | ..... |
| QWFO8781.1 | ..... |
| QWY15817.1 | ..... |
| QWFO8897.1 | ..... |
| QWY15815.1 | ..... |
| QWY15814.1 | ..... |
| QWY15718.1 | ..... |
| QYC65077.1 | ..... |
| QTA73897.1 | ..... |
| QWY15676.1 | ..... |
| QOP74939.1 | ..... |
| QOP74936.1 | ..... |
| QWFO8729.1 | ..... |
| QYC65064.1 | ..... |
| QWFO8775.1 | ..... |
| QWFO8774.1 | ..... |
| QWFO8753.1 | ..... |
| QWY15804.1 | ..... |
| QOP74943.1 | ..... |
| QIH53920.1 | ..... |
| QIH53919.1 | ..... |
| QIL87536.1 | ..... |
| UEC49854.1 | ..... |
| UEC49852.1 | ..... |
| QWY15841.1 | ..... |
| QWY15787.1 | ..... |
| QYC65128.1 | ..... |
| QYC65116.1 | ..... |
| QYC65083.1 | ..... |
| QYC65029.1 | ..... |
| QWFO8951.1 | ..... |
| QWFO8937.1 | ..... |
| QWFO8918.1 | ..... |
| QWFO8901.1 | ..... |
| QWFO8834.1 | ..... |
| QWFO8832.1 | ..... |
| QWFO8802.1 | ..... |
| QWFO8800.1 | ..... |
| QYC65123.1 | ..... |
| QWY15820.1 | ..... |
| QWY15864.1 | ..... |
| QWY15840.1 | ..... |
| QWY15786.1 | ..... |
| QWY15842.1 | ..... |
| QWY15704.1 | ..... |
| QWY15750.1 | ..... |
| QWFO8733.1 | ..... |
| QNL13228.1 | ..... |
| QNL13216.1 | ..... |
| QNL13226.1 | ..... |
| QNL13203.1 | ..... |



|            |       |
|------------|-------|
| QYC65080.1 | ..... |
| QNL13225.1 | ..... |
| QNL13224.1 | ..... |
| QNL13223.1 | ..... |
| QNL13222.1 | ..... |
| QNL13221.1 | ..... |
| QNL13220.1 | ..... |
| QNL13219.1 | ..... |
| QWF08894.1 | ..... |
| QNL13218.1 | ..... |
| QNL13217.1 | ..... |
| QNL13215.1 | ..... |
| QNL13214.1 | ..... |
| QNL13213.1 | ..... |
| QNL13212.1 | ..... |
| QNL13209.1 | ..... |
| QIL87537.1 | ..... |
| QNL13208.1 | ..... |
| QNL13207.1 | ..... |
| QNL13206.1 | ..... |
| QNL13202.1 | ..... |
| QNL13196.1 | ..... |
| QNL13195.1 | ..... |
| QNL13194.1 | ..... |
| QNL13193.1 | ..... |
| QNL13192.1 | ..... |
| QNL13191.1 | ..... |
| QNL13190.1 | ..... |
| QNL13189.1 | ..... |
| QNL13188.1 | ..... |
| QCY53846.1 | ..... |
| BCI65357.1 | ..... |
| QNL13227.1 | ..... |
| QNL13211.1 | ..... |
| QNL13198.1 | ..... |
| QNL13197.1 | ..... |
| QNL13200.1 | ..... |
| QNL13210.1 | ..... |
| QNL13205.1 | ..... |
| QNL13204.1 | ..... |
| QNL13201.1 | ..... |
| QNL13199.1 | ..... |
| QYC65157.1 | ..... |
| QYC65138.1 | ..... |
| QWF08724.1 | ..... |
| UEF53403.1 | ..... |
| QWY15843.1 | ..... |
| QWF08794.1 | ..... |
| QYC65031.1 | ..... |
| UEC49856.1 | ..... |
| BBH72184.1 | ..... |
| QWF08874.1 | ..... |
| QWF08873.1 | ..... |
| BCG67003.1 | ..... |
| QYC65095.1 | ..... |
| QOP74933.1 | ..... |
| QYC65096.1 | ..... |
| BCG67034.1 | ..... |
| BCG67031.1 | ..... |
| QYC65052.1 | ..... |
| QWF08963.1 | ..... |
| QWF08939.1 | ..... |
| QIL87538.1 | ..... |
| QIL87535.1 | ..... |
| QWF08964.1 | ..... |
| QYC65132.1 | ..... |
| QTA73893.1 | ..... |
| QWF08751.1 | ..... |
| QWY15860.1 | ..... |
| QWY15749.1 | ..... |
| QWY15744.1 | ..... |
| QWY15740.1 | ..... |
| QWY15700.1 | ..... |
| QWY15698.1 | ..... |
| QWY15672.1 | ..... |
| pdb 6LHT B | ..... |
| pdb 6LHT E | ..... |
| pdb 6LHT D | ..... |
| pdb 6LHT C | ..... |
| pdb 6LHT A | ..... |
| pdb 6LHQ A | ..... |
| pdb 6LHP A | ..... |
| pdb 6LHO A | ..... |
| pdb 6LHL A | ..... |
| pdb 6LHK A | ..... |
| pdb 6LHC A | ..... |
| pdb 6LHB A | ..... |
| pdb 6LHA A | ..... |
| QWY15708.1 | ..... |
| BBH72101.1 | ..... |
| BBH72090.1 | ..... |
| BBH72097.1 | ..... |
| BBH72089.1 | ..... |
| BBH72099.1 | ..... |
| BBH72093.1 | ..... |
| BBH72096.1 | ..... |
| BBH72094.1 | ..... |
| BBH72091.1 | ..... |
| QOP74916.1 | ..... |
| QYC65163.1 | ..... |
| QWF08736.1 | ..... |
| QWF08735.1 | ..... |
| pdb 5TSK A | ..... |
| pdb 5C9A A | ..... |
| pdb 5C4W A | ..... |
| pdb 4JGZ A | ..... |
| pdb 4JGY A | ..... |
| QWY15956.1 | ..... |
| QWF08811.1 | ..... |
| QWF08878.1 | ..... |
| QWF08869.1 | ..... |
| QWF08831.1 | ..... |
| QWF08829.1 | ..... |
| QWF08824.1 | ..... |
| QWF08822.1 | ..... |
| QWF08817.1 | ..... |
| QWF08816.1 | ..... |
| QWF08798.1 | ..... |
| QWF08779.1 | ..... |
| QWF08778.1 | ..... |
| QWF08772.1 | ..... |
| QWF08771.1 | ..... |
| QWF08745.1 | ..... |
| QWF08744.1 | ..... |
| QIH53922.1 | ..... |
| QOP74941.1 | ..... |
| QWY15812.1 | ..... |
| QOP74926.1 | ..... |
| QYC65176.1 | ..... |
| QYC65172.1 | ..... |
| QYC65168.1 | ..... |
| QWF08725.1 | ..... |
| QYC65028.1 | ..... |
| QWY15686.1 | ..... |
| QYC65023.1 | ..... |
| QYC65025.1 | ..... |
| QWY15946.1 | ..... |
| BCB92164.1 | ..... |
| QOP74935.1 | ..... |
| QOP74930.1 | ..... |
| QOP74928.1 | ..... |
| QOP74927.1 | ..... |
| QOP74925.1 | ..... |
| QOP74923.1 | ..... |

|            |       |
|------------|-------|
| QOP74922.1 | ..... |
| QOP74920.1 | ..... |
| QOP74919.1 | ..... |
| QOP74917.1 | ..... |
| QHB49260.1 | ..... |
| QWF08784.1 | ..... |
| QWF08782.1 | ..... |
| QWF08777.1 | ..... |
| QWF08757.1 | ..... |
| QWF08756.1 | ..... |
| QWF08755.1 | ..... |
| QWF08791.1 | ..... |
| QWF08786.1 | ..... |
| QYC65186.1 | ..... |
| QWY15722.1 | ..... |
| QYC65182.1 | ..... |
| QWF08754.1 | ..... |
| QWF08748.1 | ..... |
| QYC65181.1 | ..... |
| QWY15719.1 | ..... |
| QYC65180.1 | ..... |
| QWY15693.1 | ..... |
| QYC65179.1 | ..... |
| BCB92156.1 | ..... |
| QYC65178.1 | ..... |
| pdb 5C8C A | ..... |
| QWF08864.1 | ..... |
| QWF08747.1 | ..... |
| QWF08743.1 | ..... |
| QWF08741.1 | ..... |
| QWF08737.1 | ..... |
| QWF08734.1 | ..... |
| BBH72119.1 | ..... |
| QYC65177.1 | ..... |
| QWF08732.1 | ..... |
| QWF08730.1 | ..... |
| QYC65175.1 | ..... |
| QWF08727.1 | ..... |
| QYC65173.1 | ..... |
| BBH72105.1 | ..... |
| QYC65171.1 | ..... |
| pdb 5ABU A | ..... |
| QWY15716.1 | ..... |
| QWY15800.1 | ..... |
| QYC65018.1 | ..... |
| QWY15712.1 | ..... |
| QWY15711.1 | ..... |
| QWY15707.1 | ..... |
| QWY15688.1 | ..... |
| QWY15685.1 | ..... |
| QWY15684.1 | ..... |
| QYC65170.1 | ..... |
| QYC65169.1 | ..... |
| QYC65162.1 | ..... |
| QYC65099.1 | ..... |
| QYC65048.1 | ..... |
| QYC65040.1 | ..... |
| QYC65035.1 | ..... |
| QYC65032.1 | ..... |
| QYC65030.1 | ..... |
| QYC65027.1 | ..... |
| QYC65026.1 | ..... |
| QYC65024.1 | ..... |
| QYC65022.1 | ..... |
| QYC65021.1 | ..... |
| QYC65020.1 | ..... |
| QYC65019.1 | ..... |
| QWF08742.1 | ..... |
| QWF08728.1 | ..... |
| QWF08726.1 | ..... |
| QYC65054.1 | ..... |
| QWF08746.1 | ..... |
| QYC65033.1 | ..... |
| QWY15952.1 | ..... |
| QYC65042.1 | ..... |
| QYC65017.1 | ..... |
| QOP74918.1 | ..... |
| QWF08731.1 | ..... |
| BBH72123.1 | ..... |
| BBH72114.1 | ..... |
| BBH72092.1 | ..... |
| BBH72095.1 | ..... |
| BBH72186.1 | ..... |
| QWY15975.1 | ..... |
| QWY15974.1 | ..... |
| QWY15968.1 | ..... |
| QWY15960.1 | ..... |
| QWY15959.1 | ..... |
| QWY15953.1 | ..... |
| QWY15951.1 | ..... |
| QWY15950.1 | ..... |
| QWY15949.1 | ..... |
| QWY15944.1 | ..... |
| QWY15943.1 | ..... |
| QWY15942.1 | ..... |
| QWY15939.1 | ..... |
| QWY15938.1 | ..... |
| QWY15937.1 | ..... |
| QWY15936.1 | ..... |
| QWY15934.1 | ..... |
| QWY15896.1 | ..... |
| BCU41098.1 | ..... |
| BCR43090.1 | ..... |
| QYC65129.1 | ..... |
| QWF08961.1 | ..... |
| QIL87527.1 | ..... |
| QWY15955.1 | ..... |
| QWY15954.1 | ..... |
| QWY15945.1 | ..... |
| QWY15935.1 | ..... |
| BCB92163.1 | ..... |
| BCB92158.1 | ..... |
| BCB92154.1 | ..... |
| BCB92152.1 | ..... |
| BCB92162.1 | ..... |
| BCB92161.1 | ..... |
| BCB92160.1 | ..... |
| BBH72129.1 | ..... |
| QIL87533.1 | ..... |
| BBH72150.1 | ..... |
| BBH72137.1 | ..... |
| BBH72145.1 | ..... |
| BCB92157.1 | ..... |
| QYC65124.1 | ..... |
| QWY15920.1 | ..... |
| QWY15973.1 | ..... |
| BCU41116.1 | ..... |
| QWF08960.1 | ..... |
| QWF08958.1 | ..... |
| QWF08919.1 | ..... |
| QWY15825.1 | ..... |
| QWF08953.1 | ..... |
| QWF08948.1 | ..... |
| QWY15884.1 | ..... |
| QWF08946.1 | ..... |
| QWF08941.1 | ..... |
| QWF08914.1 | ..... |
| BCU41097.1 | ..... |
| QWY15918.1 | ..... |
| BCR43086.1 | ..... |
| QWF08935.1 | ..... |
| QWY15912.1 | ..... |
| QWY15911.1 | ..... |
| QWY15887.1 | ..... |

|            |            |
|------------|------------|
| QWY15882.1 | .....      |
| BCG67018.1 | .....      |
| QWY15881.1 | .....      |
| QWY15875.1 | .....      |
| BCG67016.1 | .....      |
| QWY15874.1 | .....      |
| QWY15853.1 | .....      |
| BCG67014.1 | .....      |
| BCG67009.1 | .....      |
| QWF08933.1 | .....      |
| BCG66992.1 | .....      |
| BCG66991.1 | .....      |
| QWF08898.1 | .....      |
| QWF08930.1 | .....      |
| QWF08925.1 | .....      |
| QWF08913.1 | .....      |
| QWF08911.1 | .....      |
| BBH72117.1 | .....      |
| BBH72116.1 | .....      |
| BBH72113.1 | .....      |
| BBH72112.1 | .....      |
| BBH72108.1 | .....      |
| BBH72106.1 | .....      |
| BBH72104.1 | .....      |
| BBH72211.1 | .....      |
| BBH72210.1 | .....      |
| BBH72209.1 | .....      |
| BBH72208.1 | .....      |
| BBH72207.1 | .....      |
| BBH72205.1 | .....      |
| BBH72201.1 | .....      |
| BBH72193.1 | .....      |
| BBH72192.1 | .....      |
| BBH72190.1 | .....      |
| BBH72189.1 | .....      |
| BBH72188.1 | .....      |
| BBH72187.1 | .....      |
| BBH72185.1 | .....      |
| BBH72182.1 | .....      |
| BBH72181.1 | .....      |
| BBH72179.1 | .....      |
| BBH72178.1 | .....      |
| BBH72177.1 | .....      |
| BBH72175.1 | .....      |
| BBH72174.1 | .....      |
| BBH72172.1 | .....      |
| BBH72170.1 | .....      |
| BBH72169.1 | .....      |
| BBH72168.1 | .....      |
| BBH72158.1 | .....      |
| BBH72155.1 | .....      |
| BBH72154.1 | .....      |
| BBH72151.1 | .....      |
| BBH72148.1 | .....      |
| BBH72144.1 | .....      |
| BBH72142.1 | .....      |
| BBH72141.1 | .....      |
| BBH72140.1 | .....      |
| BBH72132.1 | .....      |
| BBH72131.1 | .....      |
| BBH72130.1 | .....      |
| BBH72128.1 | .....      |
| BDC16283.1 | .....      |
| BDC16271.1 | .....      |
| BDC16270.1 | .....      |
| BDC16258.1 | .....      |
| QIL87526.1 | .....      |
| BBH72180.1 | .....      |
| BBH72109.1 | .....      |
| BBH72115.1 | .....      |
| BBH72152.1 | .....      |
| BBH72200.1 | .....      |
| QWY15844.1 | .....      |
| BBH72146.1 | .....      |
| BBH72173.1 | .....      |
| QWY15947.1 | .....      |
| BDC16281.1 | .....      |
| BBH72167.1 | .....      |
| BBH72160.1 | .....      |
| BCU41096.1 | .....      |
| BCR43102.1 | .....      |
| QWF08881.1 | .....      |
| QWF08855.1 | .....      |
| BBH72195.1 | .....      |
| BBH72118.1 | .....      |
| BBH72126.1 | .....      |
| BBH72127.1 | .....      |
| BBH72206.1 | .....      |
| BBH72196.1 | .....      |
| BBH72171.1 | .....      |
| BBH72191.1 | .....      |
| BBH72133.1 | .....      |
| BBH72139.1 | .....      |
| BBH72166.1 | .....      |
| BBH72161.1 | .....      |
| BBH72165.1 | .....      |
| BBH72164.1 | .....      |
| BBH72159.1 | .....      |
| BBH72157.1 | .....      |
| BBH72162.1 | .....      |
| BBH72153.1 | .....      |
| BBH72156.1 | .....      |
| BBH72120.1 | .....      |
| BBH72198.1 | .....      |
| BBH72197.1 | .....      |
| QWY15941.1 | .....      |
| BBH72121.1 | .....      |
| BBH72135.1 | .....      |
| QWY15967.1 | .....      |
| QWY15964.1 | .....      |
| QWY15969.1 | .....      |
| QWY15913.1 | .....      |
| QWY15908.1 | .....      |
| QWY15907.1 | .....      |
| QWY15890.1 | .....      |
| QWY15889.1 | .....      |
| QWY15888.1 | .....      |
| QWY15886.1 | .....      |
| QWY15885.1 | .....      |
| QWY15883.1 | .....      |
| QWY15878.1 | .....      |
| QWY15876.1 | .....      |
| BBH72176.1 | .....      |
| QIL87519.1 | .....      |
| QWY15906.1 | .....      |
| QWY15917.1 | .....      |
| QWY15846.1 | .....      |
| QWY15901.1 | .....      |
| QWY15857.1 | .....      |
| QWY15904.1 | .....      |
| BBH72204.1 | .....      |
| BBH72203.1 | .....      |
| BBH72202.1 | .....      |
| BDC16266.1 | .....      |
| BCR43091.1 | .....      |
| QWY15902.1 | .....      |
| BBH72226.1 | .....      |
| BBH72222.1 | .....      |
| BBH72012.1 | YEGGV..... |
| BBH71965.1 | YEGGV..... |
| BBH71934.1 | YEGG.....  |
| BBH72009.1 | NEGG.....  |
| QWY16175.1 | .....      |
| QWY16167.1 | .....      |



QWY16174.1 .....  
QWY16171.1 .....  
QWY16173.1 .....  
QWY16172.1 .....  
QWY16170.1 .....  
QWY16169.1 .....  
QWY16168.1 .....  
QXF31588.1 .....  
QXF31587.1 .....  
pdb|6IIJ|A M.....  
pdb|6IIJ|A M.....  
pdb|6AKS|A .....  
BCD33944.1 AFG.....  
pdb|7ECY|A VKTMPHNIVNT  
pdb|7EC5|A VKTMPHNIVNT  
pdb|7EBZ|A VKTMPHNIVNT  
pdb|7EBR|A VKTMPHNIVNT  
pdb|6MZI|A VKTMPHNIVNT  
pdb|6CSH|A VKTMPHNIVNT  
pdb|6CSG|A VKTMPHNIVNT  
pdb|6CSA|A VKTMPHNIVNT  
pdb|6CS6|A VKTMPHNIVNT  
pdb|6CS5|A VKTMPHNIVNT  
pdb|6CS4|A VKTMPHNIVNT  
pdb|6CS3|A VKTMPHNIVNT  
pdb|6CRU|A VKTMPHNIVNT  
pdb|6CRS|A VKTMPHNIVNT  
pdb|6CRR|A VKTMPHNIVNT  
pdb|6CRP|A VKTMPHNIVNT  
QNO39042.1 VKTMPHNIVTT  
QNO39041.1 VKTMPHNIVTT  
QNO39040.1 VKTMPHNIVTT  
QNO39038.1 VKTMPHNIVTT  
QNO39039.1 VKTMPHNIVTT  
CAA1539354.1 VKTMPHNIVTT  
CAA1527138.1 VKTMPHNIVTT  
CAA1539353.1 VKTMPHNIVTT  
CAA1527136.1 VKTMPHNIVTT  
QNO39037.1 VKTMPHNIVTT  
QKX95883.1 .....  
pdb|5BNP|A VTTMPHNIVTT  
pdb|5BNO|A VTTMPHNIVTT  
pdb|5BNN|A VTTMPHNIVTT  
pdb|4WM8|A VTTMPHNIVTT  
pdb|4WM7|A VTTMPHNIVTT  
QIC50353.1 .....  
QIC50352.1 .....  
QIC50356.1 .....
